# Supplementary material for: The substituent effect on the spin-crossover behaviour in a series of mononuclear Fe(ii) complexes from thio-pybox ligands
Source: Royal Society of Chemistry journal article supplement (doi:10.1039/d2qi00208f), 2022-01-01
Supplement: d2qi00208f1.pdf [file d2qi00208f1.pdf]

## Supporting Information

# Substituent effect on the spin-crossover behaviour in series mononuclear Fe(II) complexes from thio-pybox ligands

Hai-Chao Liang,<sup>a</sup> Yao Pan,<sup>a</sup> Hai-Lang Zhu,<sup>b</sup> Yin-Shan Meng,<sup>b</sup> Chun-Hua Liu,<sup>a</sup> Tao  
Liu<sup>b\*</sup> and Yuan-Yuan Zhu<sup>a,b\*</sup>

\*E-mail: yyzhu@hfut.edu.cn; liutao@dlut.edu.cn

<sup>a</sup>*School of Chemistry and Chemical Engineering, Hefei University of Technology and  
Anhui Key Laboratory of Advanced Functional Materials and Devices, Hefei 230009,  
China.*

<sup>b</sup>*State Key Laboratory of Fine Chemicals, Dalian University of Technology, 2 Linggong  
Road, Dalian 116024, China.*

## Contents

|                                                                                         |    |
|-----------------------------------------------------------------------------------------|----|
| <b>SI1 NMR spectra, UV-vis spectra, and TGA traces</b> .....                            | 2  |
| <b>SI2 Structural details of the complexes</b> .....                                    | 17 |
| <b>SI3 Supplementary magnetic properties</b> .....                                      | 21 |
| SI3.1 Solid-state magnetic properties.....                                              | 21 |
| SI3.2 Solution-state magnetic properties.....                                           | 23 |
| <b>SI4 The details of DFT calculations</b> .....                                        | 26 |
| SI4.1 Cartesian coordinates for the 12 optimized geometries .....                       | 26 |
| SI4.2 The optimized geometric structures and the summary of their structural parameters | 40 |
| <b>SI5 References</b> .....                                                             | 45 |

## SI1 NMR spectra, UV-vis spectra, and TGA traces

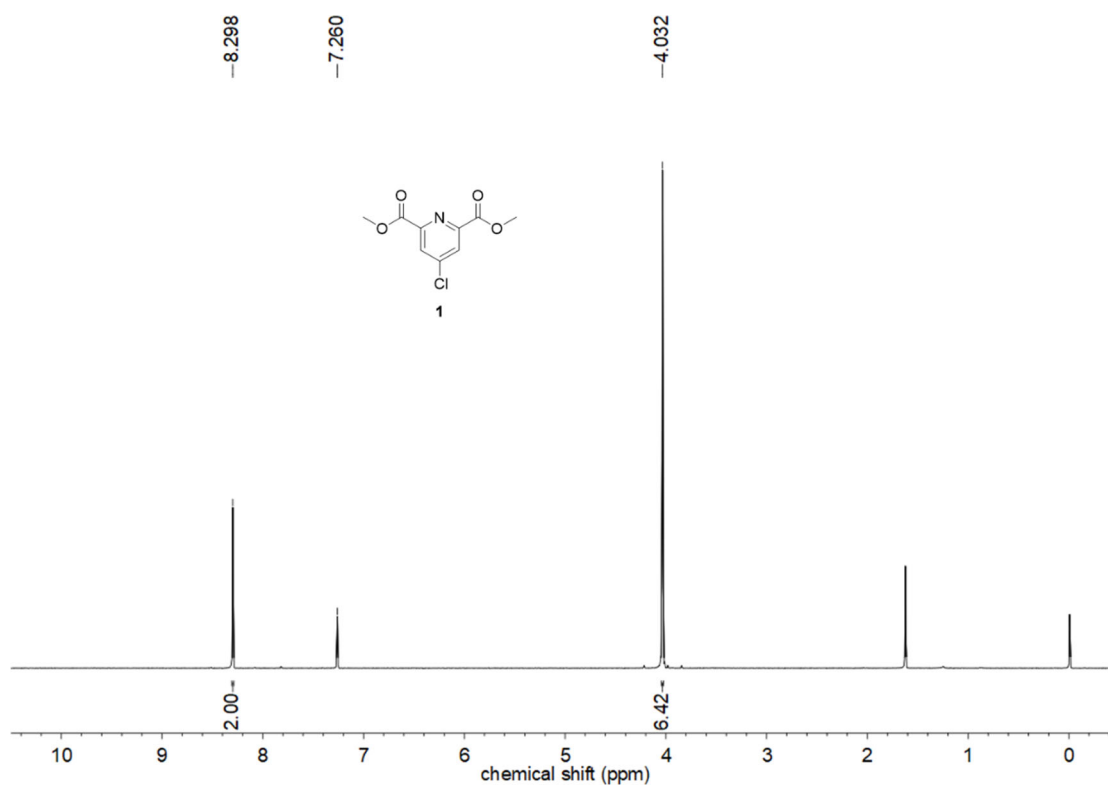

Fig. S1 <sup>1</sup>H NMR spectrum of compound 1 (400 MHz) in CDCl<sub>3</sub>.

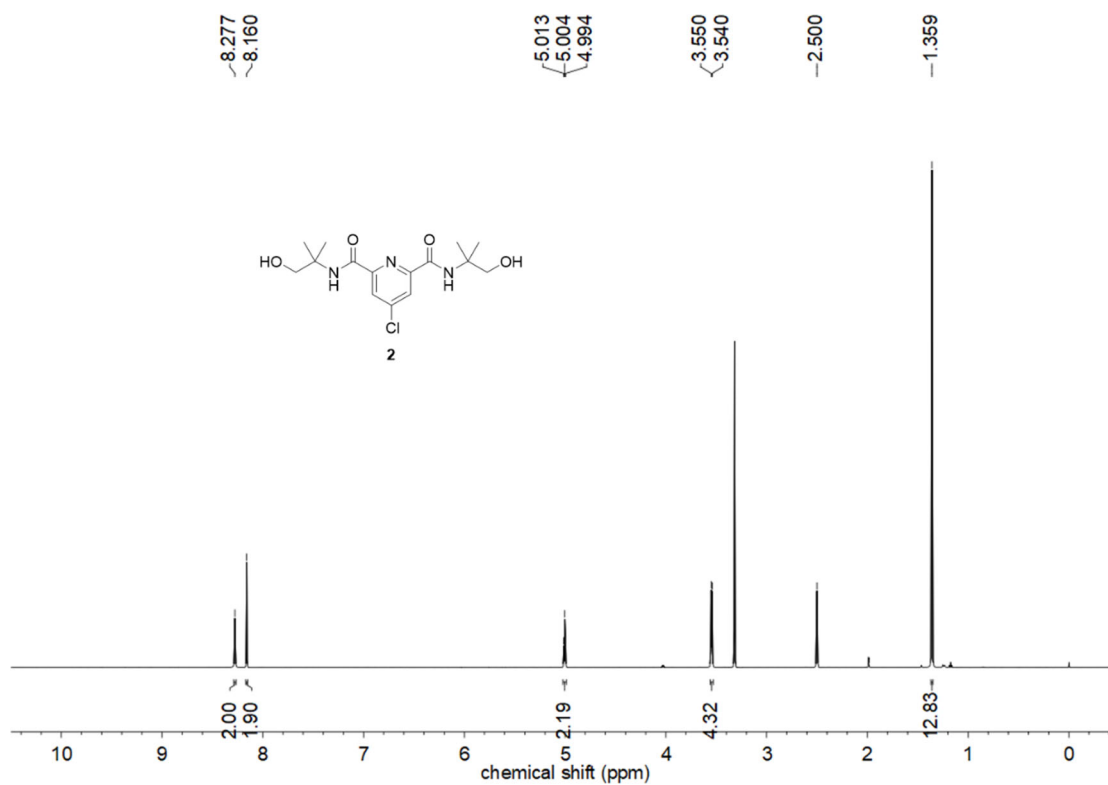

Fig. S2 <sup>1</sup>H NMR spectrum of compound 2 (600 MHz) in DMSO-*d*<sub>6</sub>.

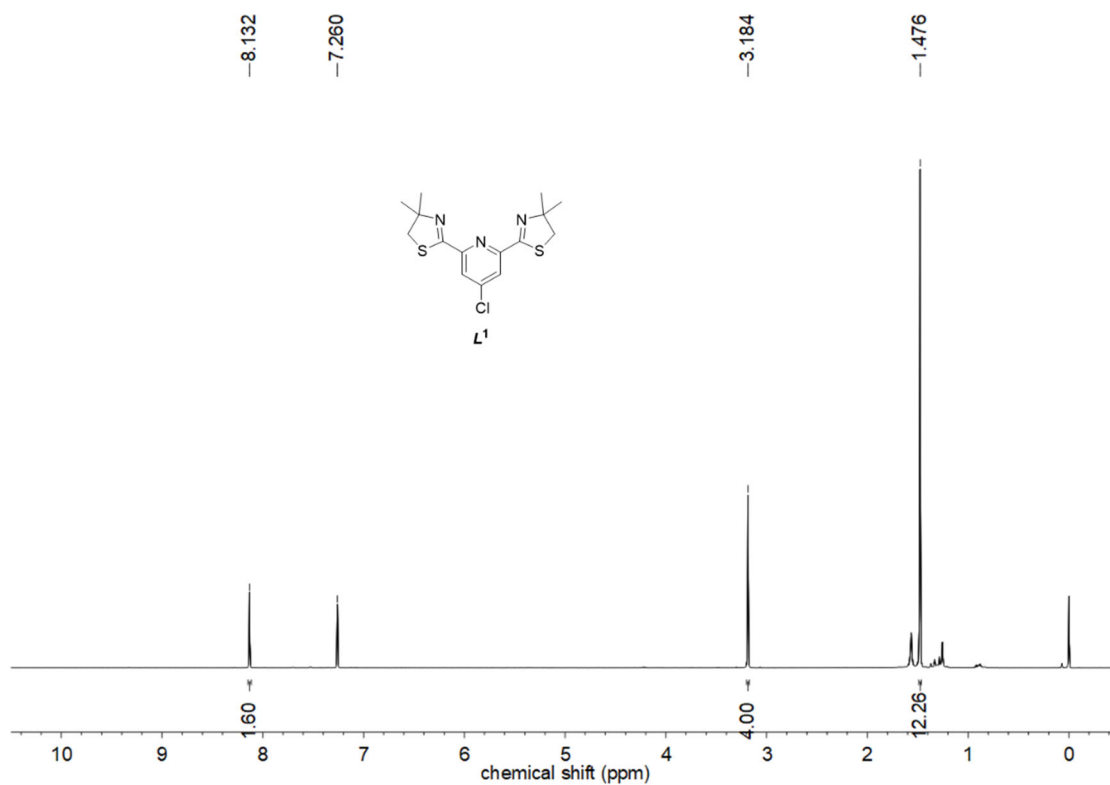

**Fig. S3**  $^1\text{H}$  NMR spectrum of compound  $L^1$  (600 MHz) in  $\text{CDCl}_3$ .

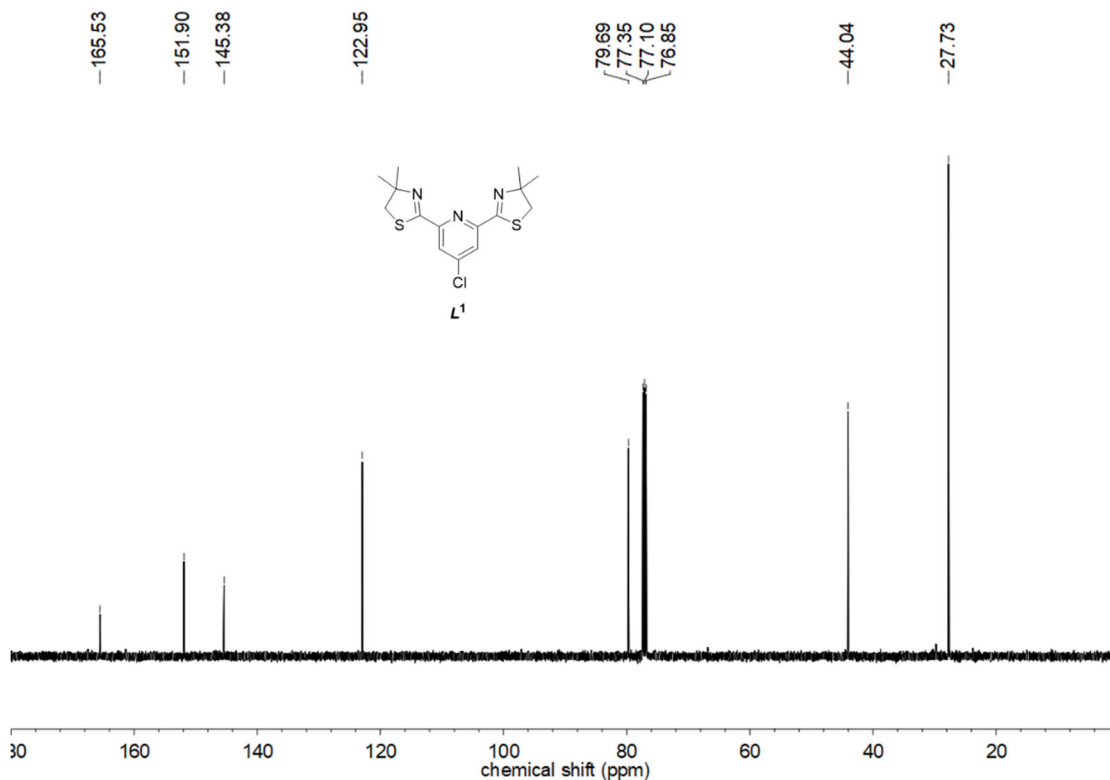

**Fig. S4**  $^{13}\text{C}$  NMR spectrum of compound  $L^1$  (125 MHz) in  $\text{CDCl}_3$ .

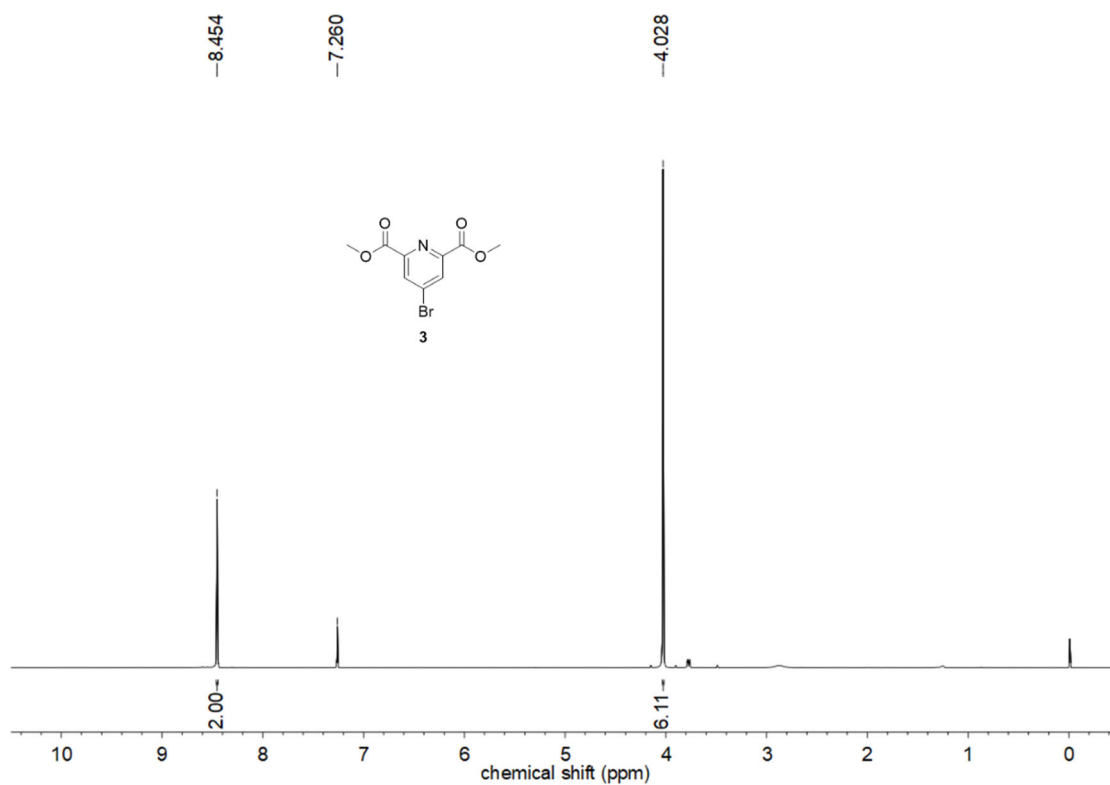

**Fig. S5**  $^1\text{H}$  NMR spectrum of compound **3** (600 MHz) in  $\text{CDCl}_3$ .

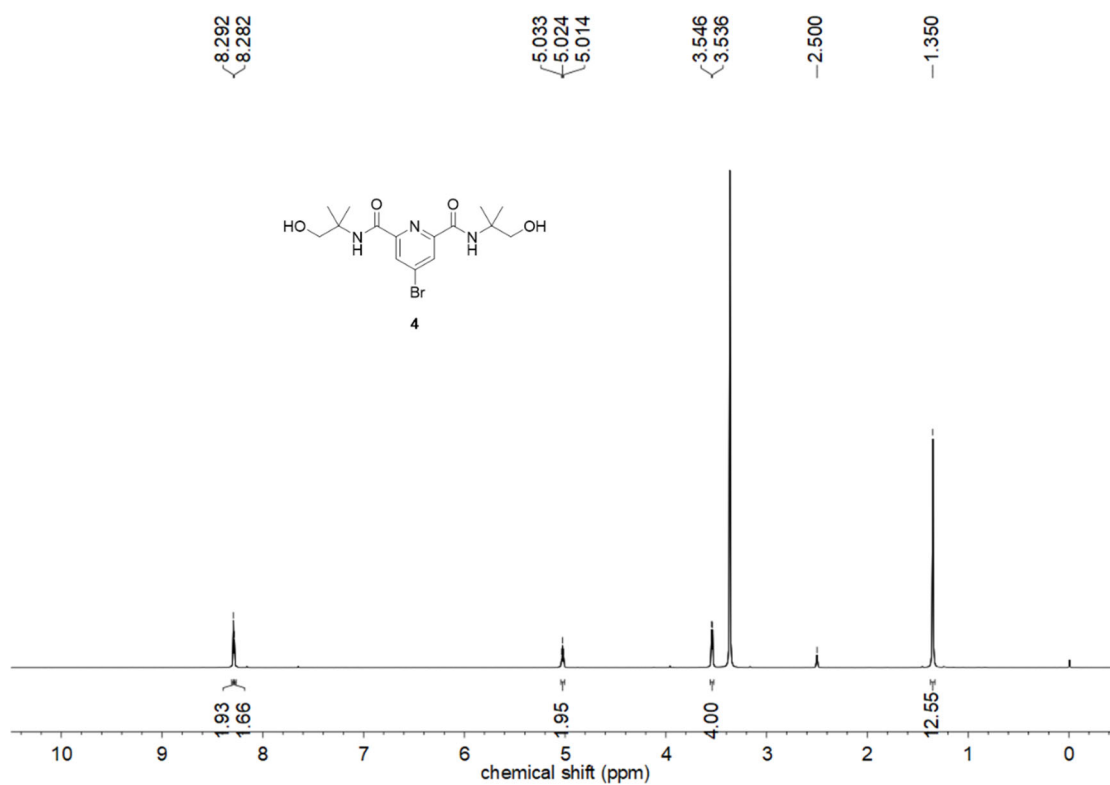

**Fig. S6**  $^1\text{H}$  NMR spectrum of compound **4** (600 MHz) in  $\text{DMSO}-d_6$ .

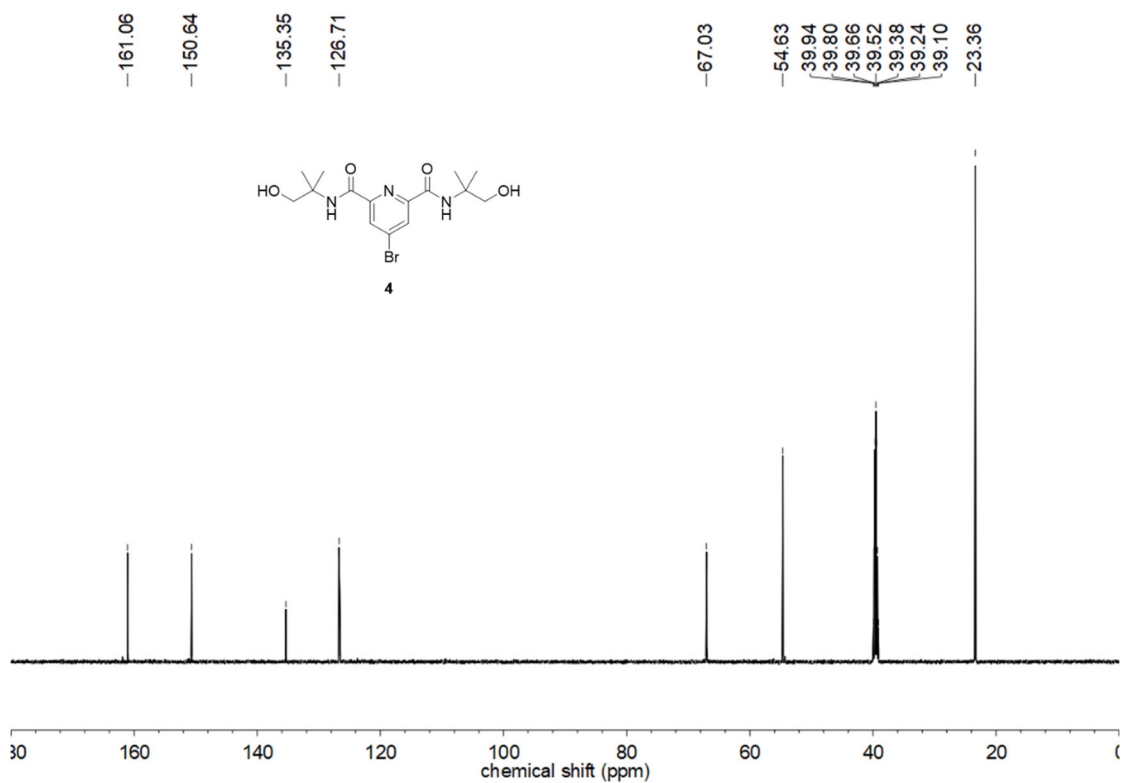

**Fig. S7**  $^{13}\text{C}$  NMR spectrum of compound **4** (125 MHz) in  $\text{DMSO-}d_6$ .

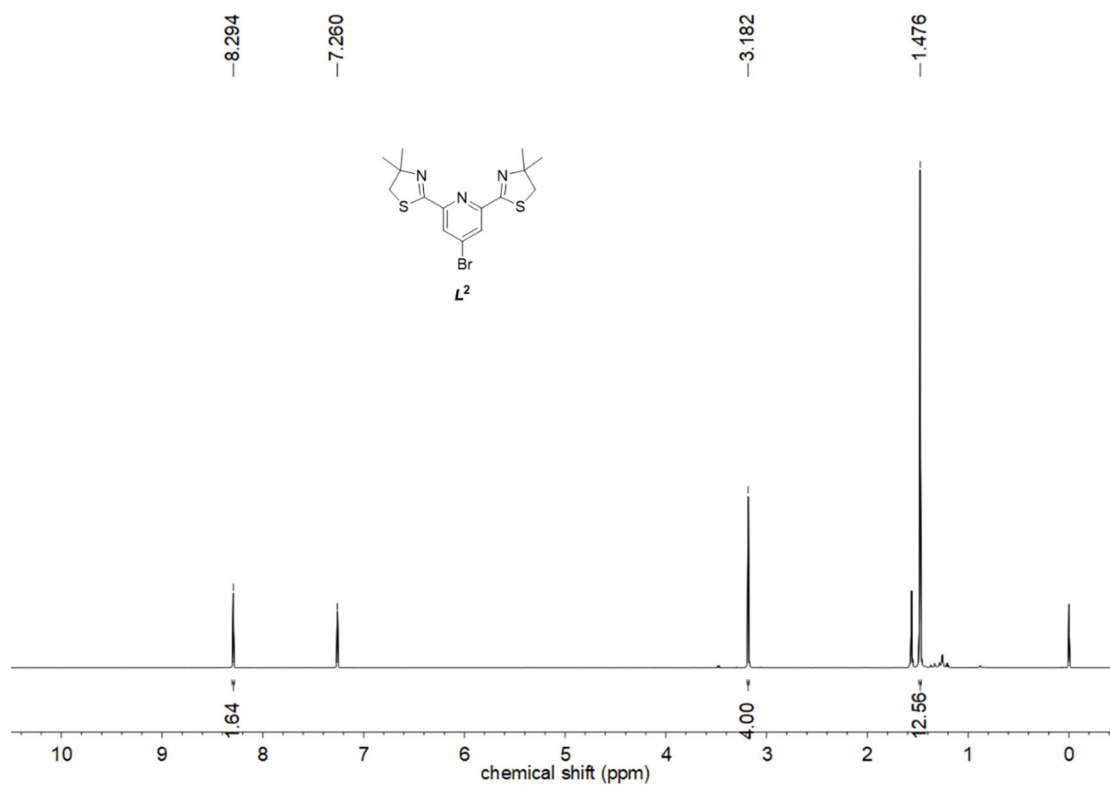

**Fig. S8**  $^1\text{H}$  NMR spectrum of compound **L<sup>2</sup>** (600 MHz) in  $\text{CDCl}_3$ .

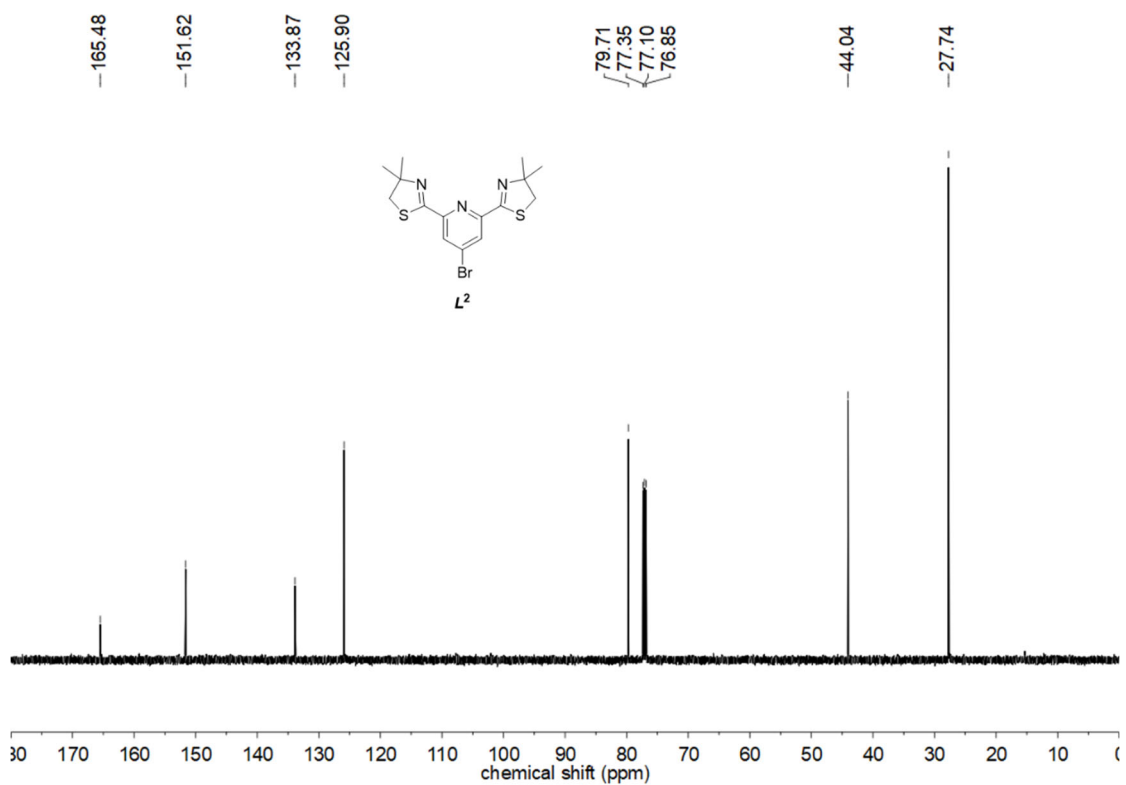

**Fig. S9**  $^{13}\text{C}$  NMR spectrum of compound  $L^2$  (125 MHz) in  $\text{CDCl}_3$ .

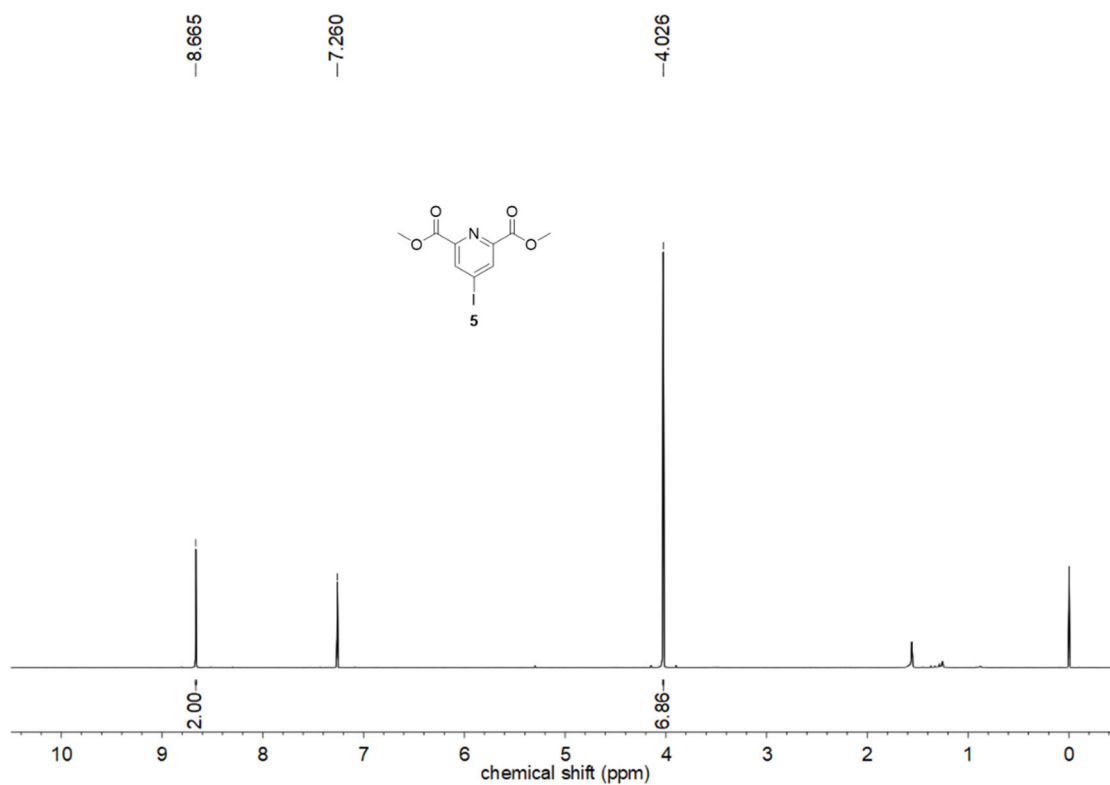

**Fig. S10**  $^1\text{H}$  NMR spectrum of compound **5** (600 MHz) in  $\text{CDCl}_3$ .

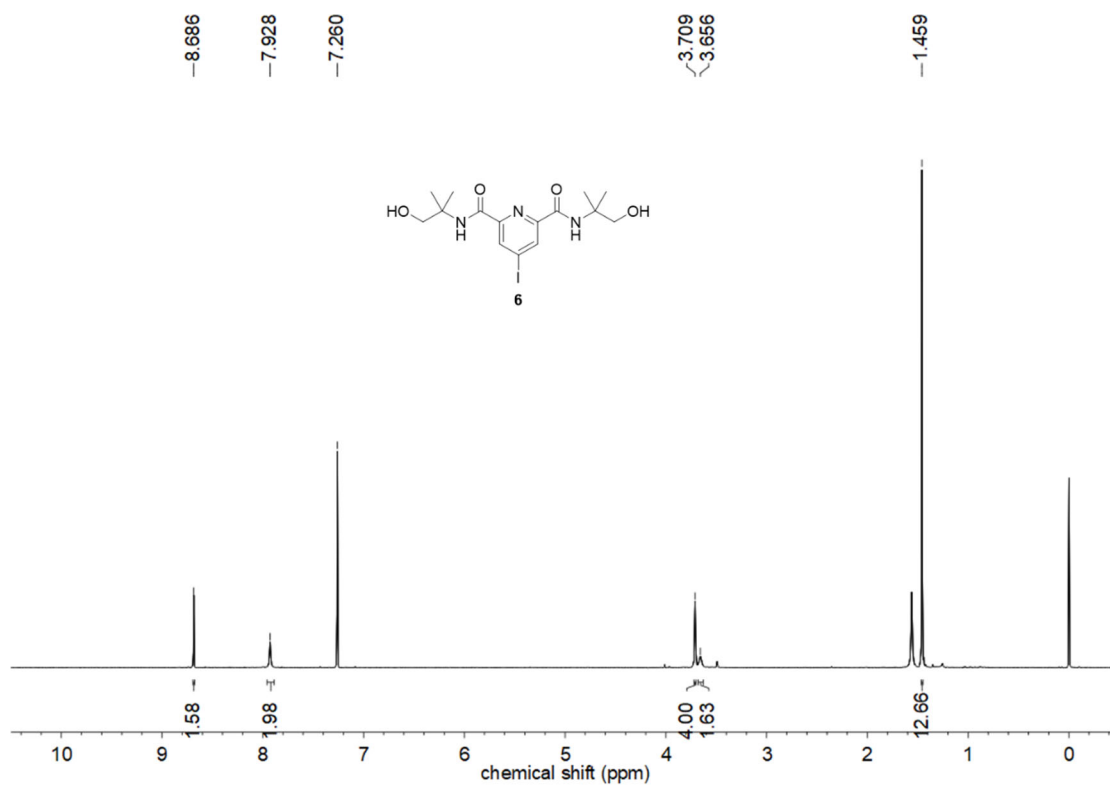

**Fig. S11**  $^1\text{H}$  NMR spectrum of compound **6** (600 MHz) in  $\text{CDCl}_3$ .

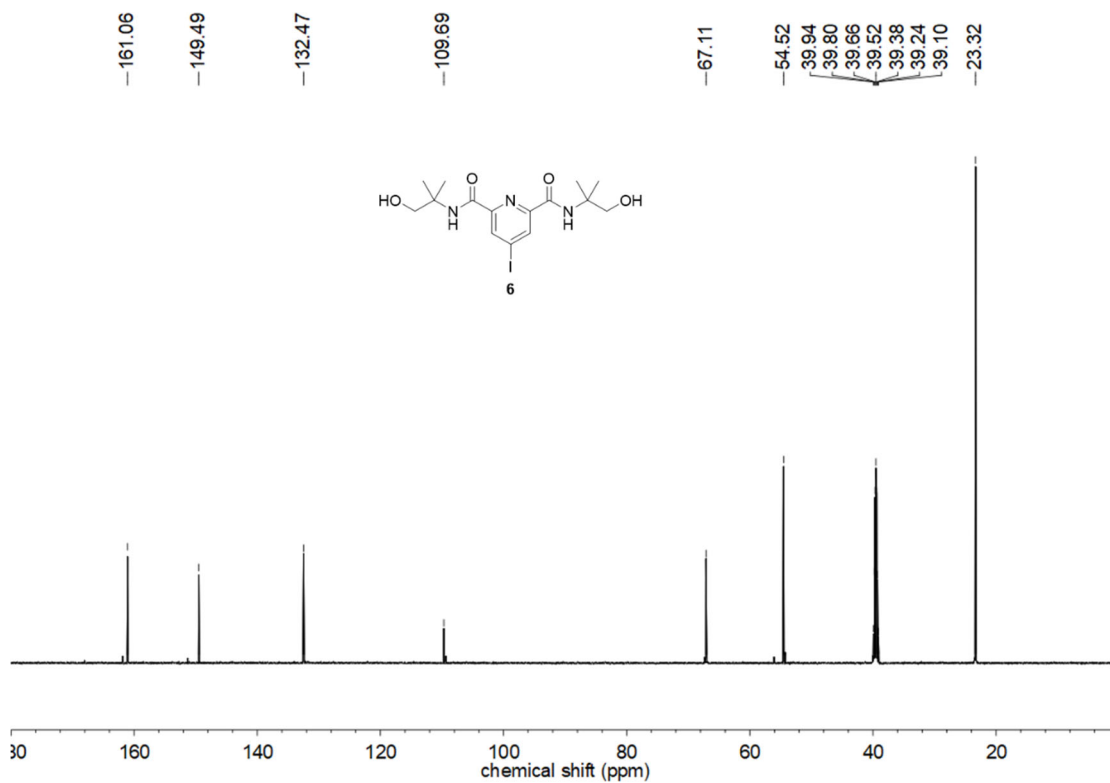

**Fig. S12**  $^{13}\text{C}$  NMR spectrum of compound **6** (125 MHz) in  $\text{DMSO-}d_6$ .

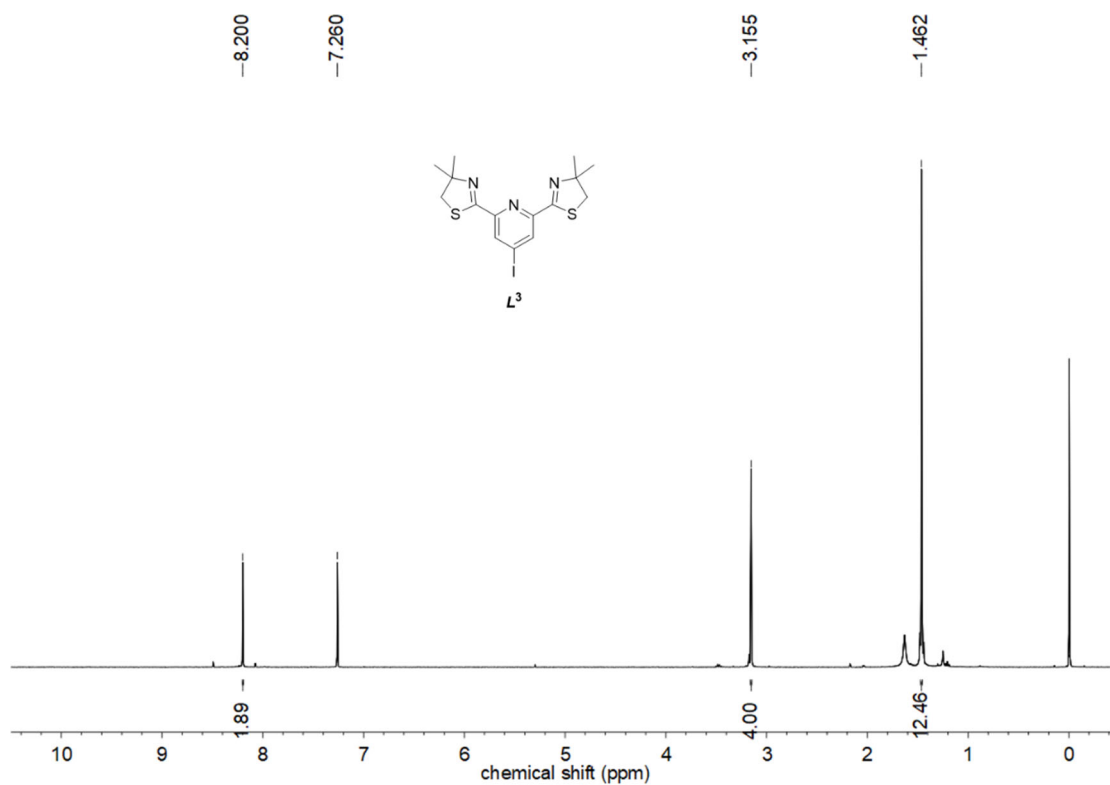

**Fig. S13**  $^1\text{H}$  NMR spectrum of compound  $L^3$  (600 MHz) in  $\text{CDCl}_3$ .

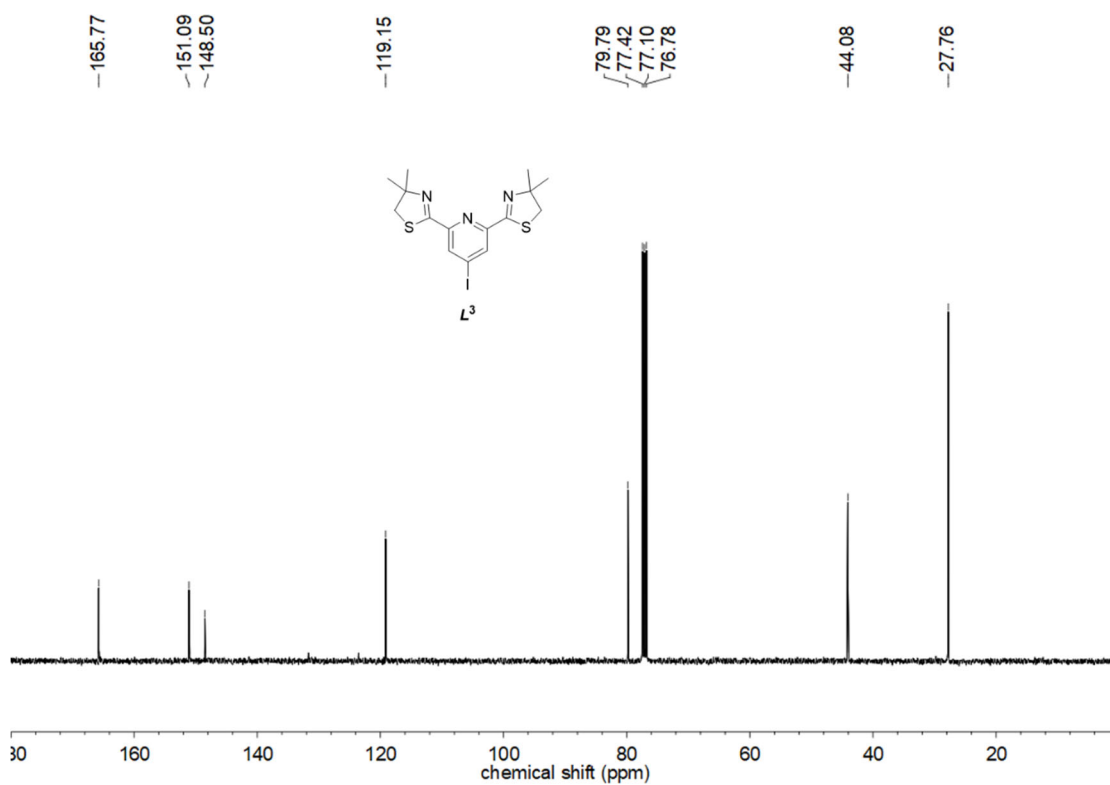

**Fig. S14**  $^{13}\text{C}$  NMR spectrum of compound  $L^3$  (125 MHz) in  $\text{CDCl}_3$ .



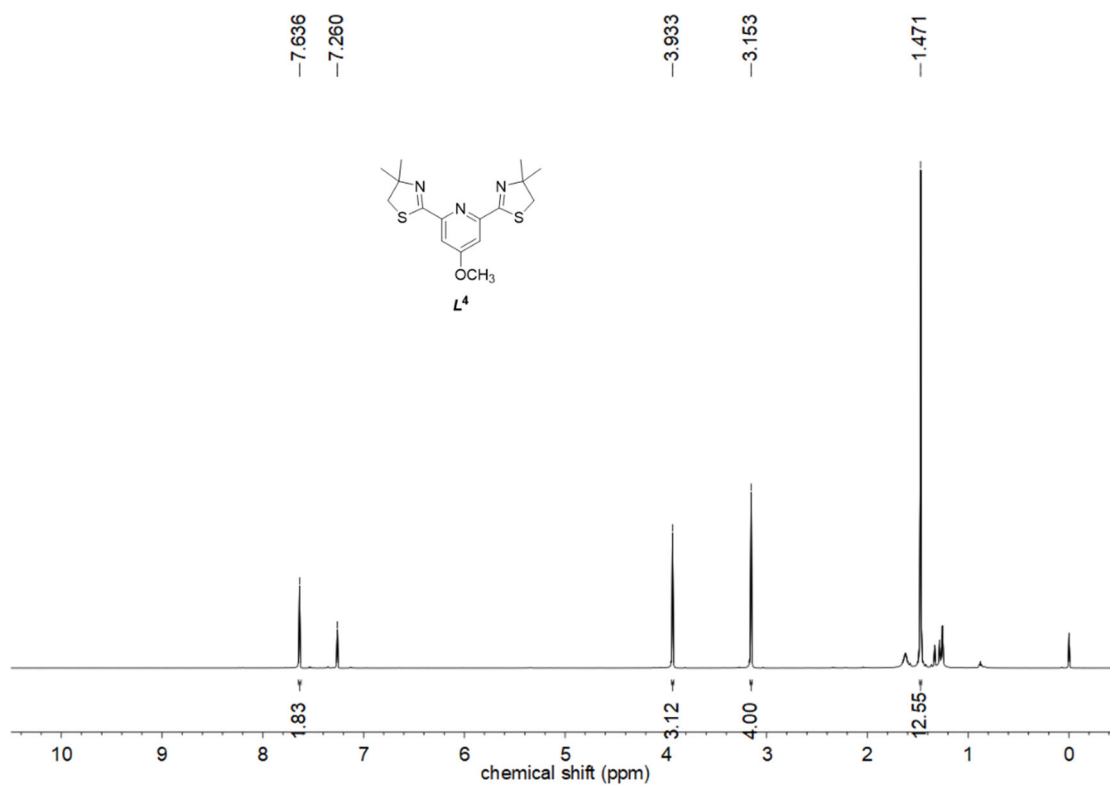

**Fig. S15**  $^1\text{H}$  NMR spectrum of compound  $L^4$  (600 MHz) in  $\text{CDCl}_3$ .

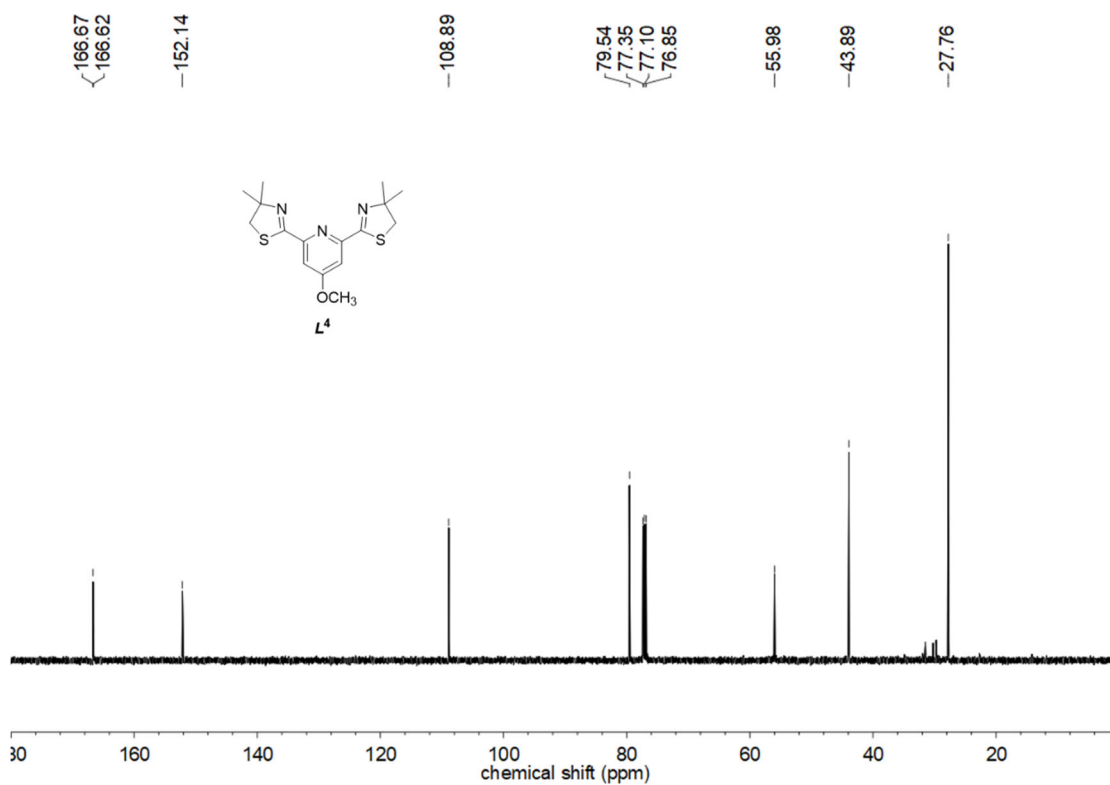

**Fig. S16**  $^{13}\text{C}$  NMR spectrum of compound  $L^4$  (125 MHz) in  $\text{CDCl}_3$ .

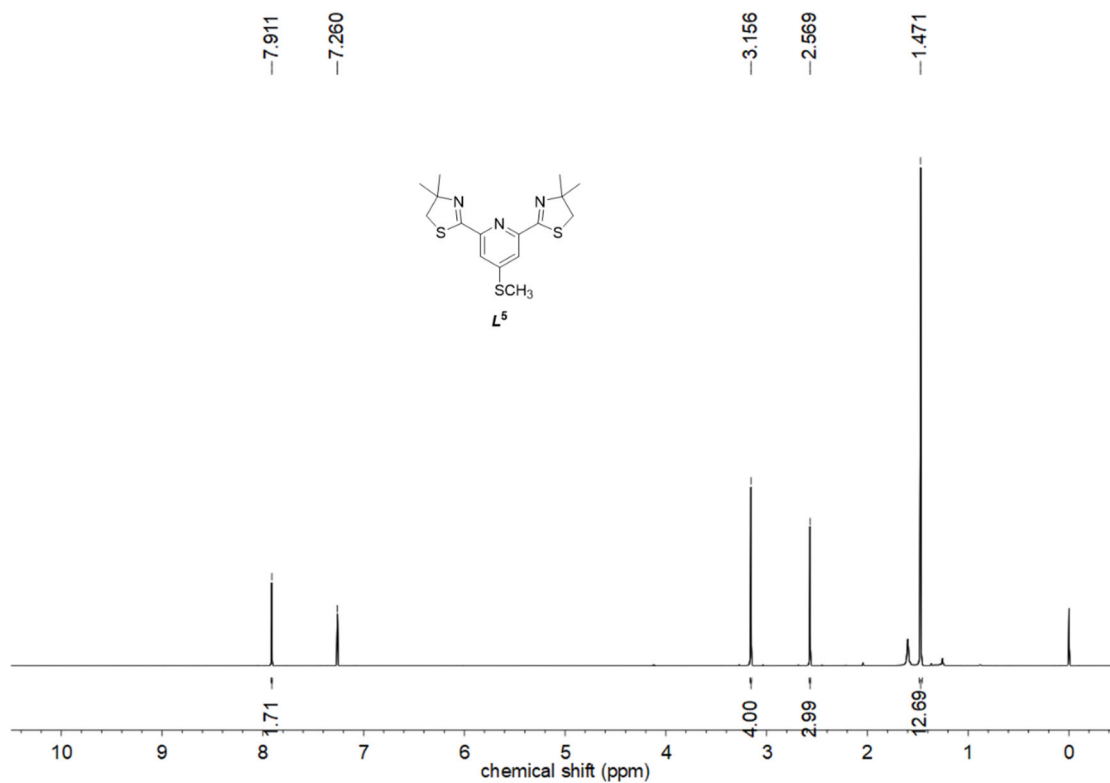

**Fig. S17**  $^1\text{H}$  NMR spectrum of compound  $L^5$  (600 MHz) in  $\text{CDCl}_3$ .

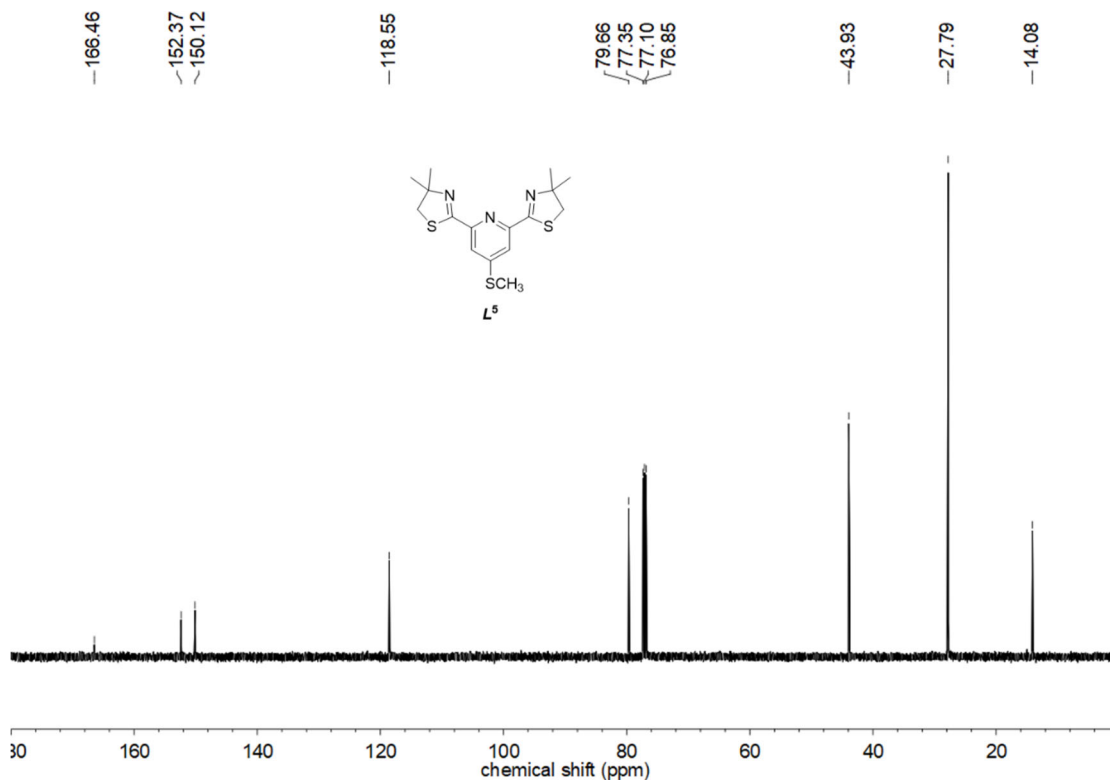

**Fig. S18**  $^{13}\text{C}$  NMR spectrum of compound  $L^5$  (125 MHz) in  $\text{CDCl}_3$ .

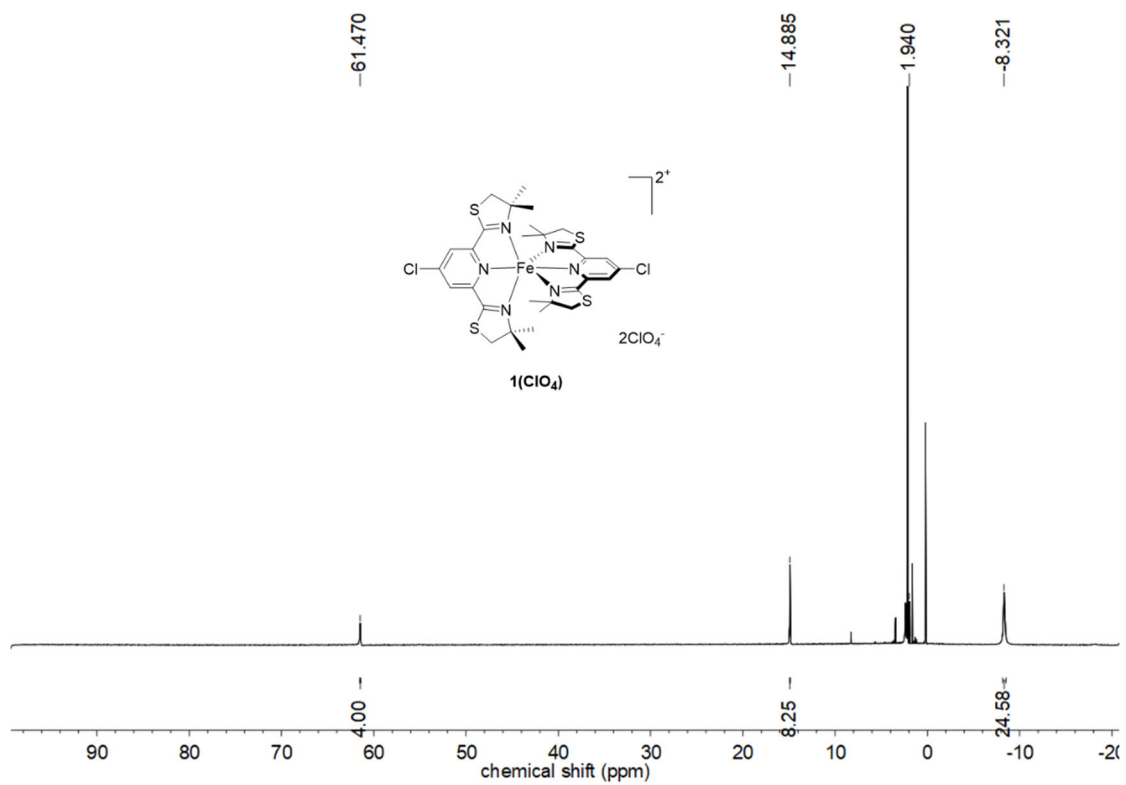

**Fig. S19** <sup>1</sup>H NMR spectrum of **1(ClO<sub>4</sub>)** (400 MHz) in CD<sub>3</sub>CN at 293 K.

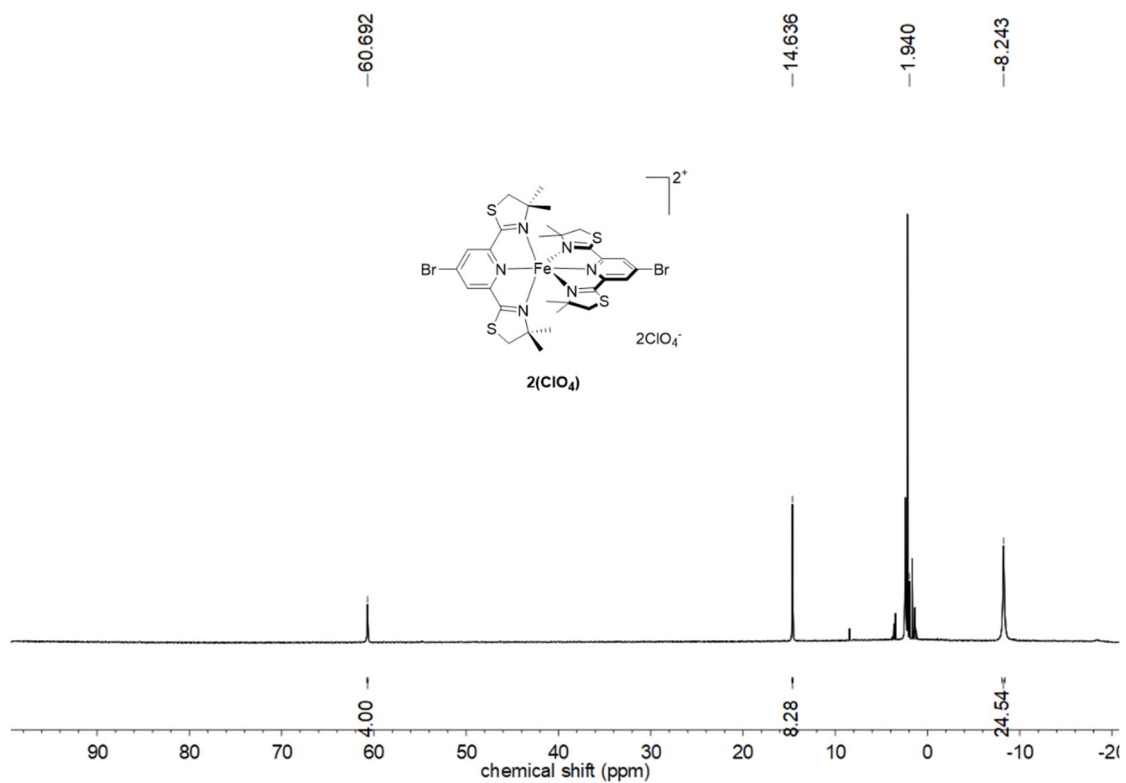

**Fig. S20** <sup>1</sup>H NMR spectrum of **2(ClO<sub>4</sub>)** (400 MHz) in CD<sub>3</sub>CN at 293 K.

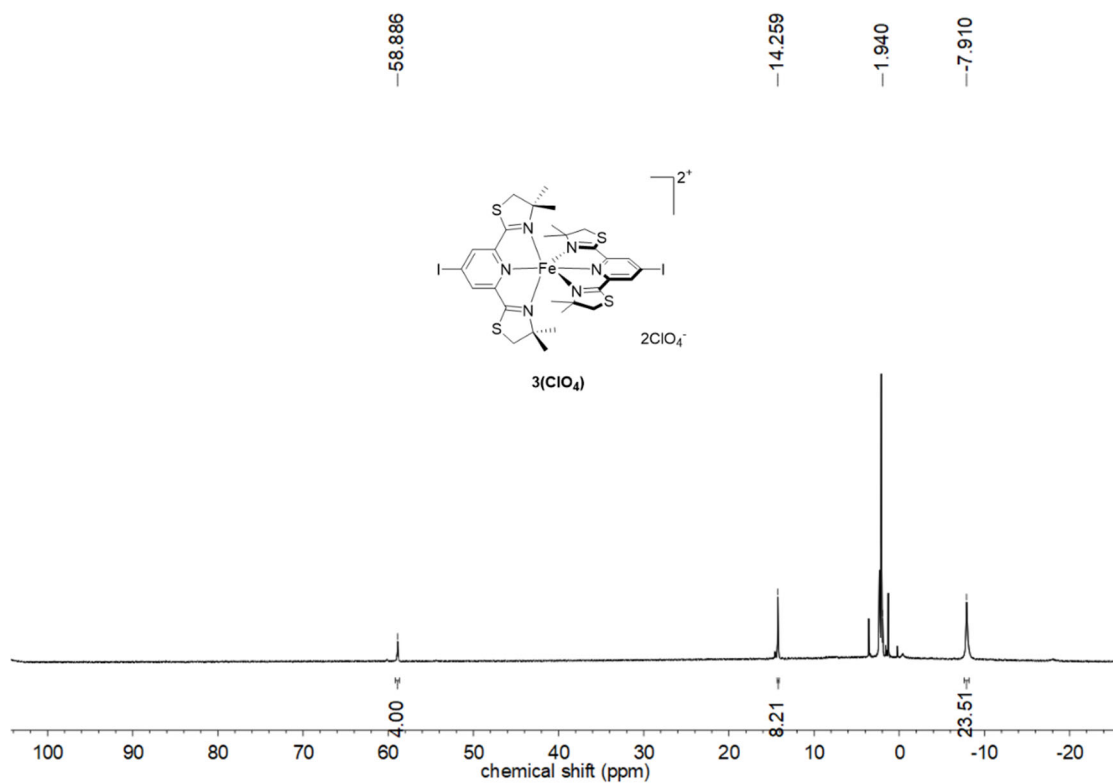

**Fig. S21** <sup>1</sup>H NMR spectrum of **3(ClO<sub>4</sub>)** (400 MHz) in CD<sub>3</sub>CN at 293 K.

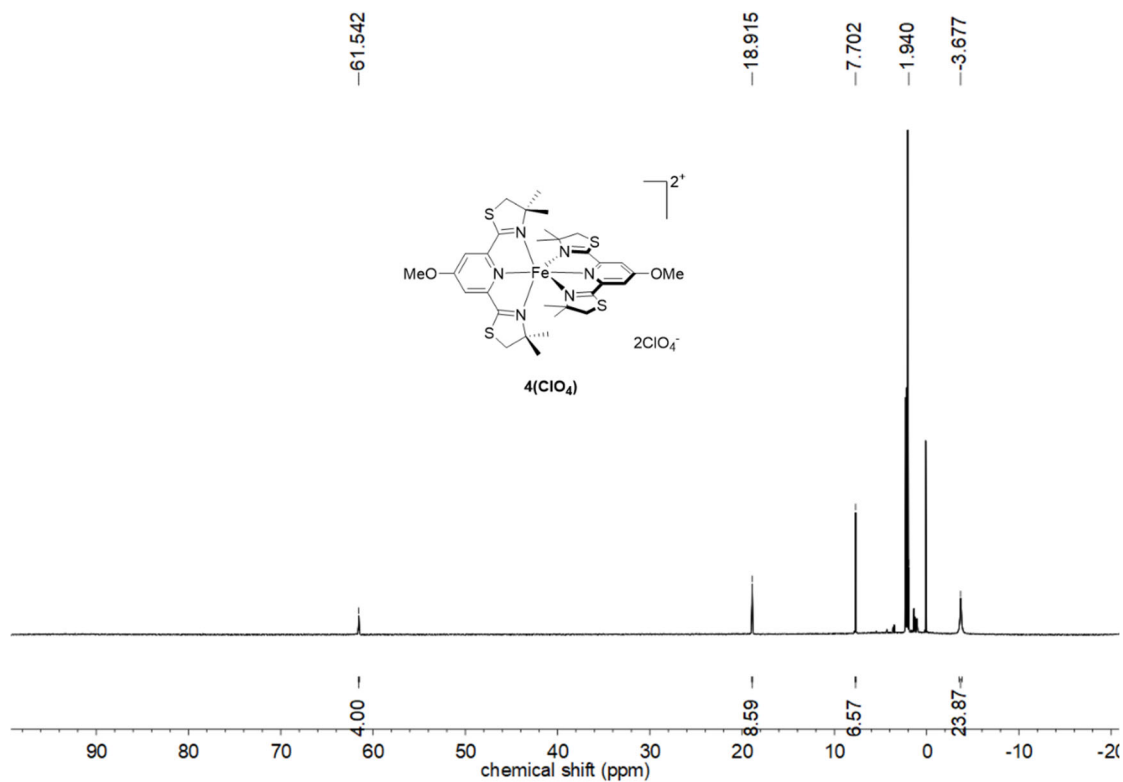

**Fig. S22** <sup>1</sup>H NMR spectrum of **4(ClO<sub>4</sub>)** (400 MHz) in CD<sub>3</sub>CN at 293 K.

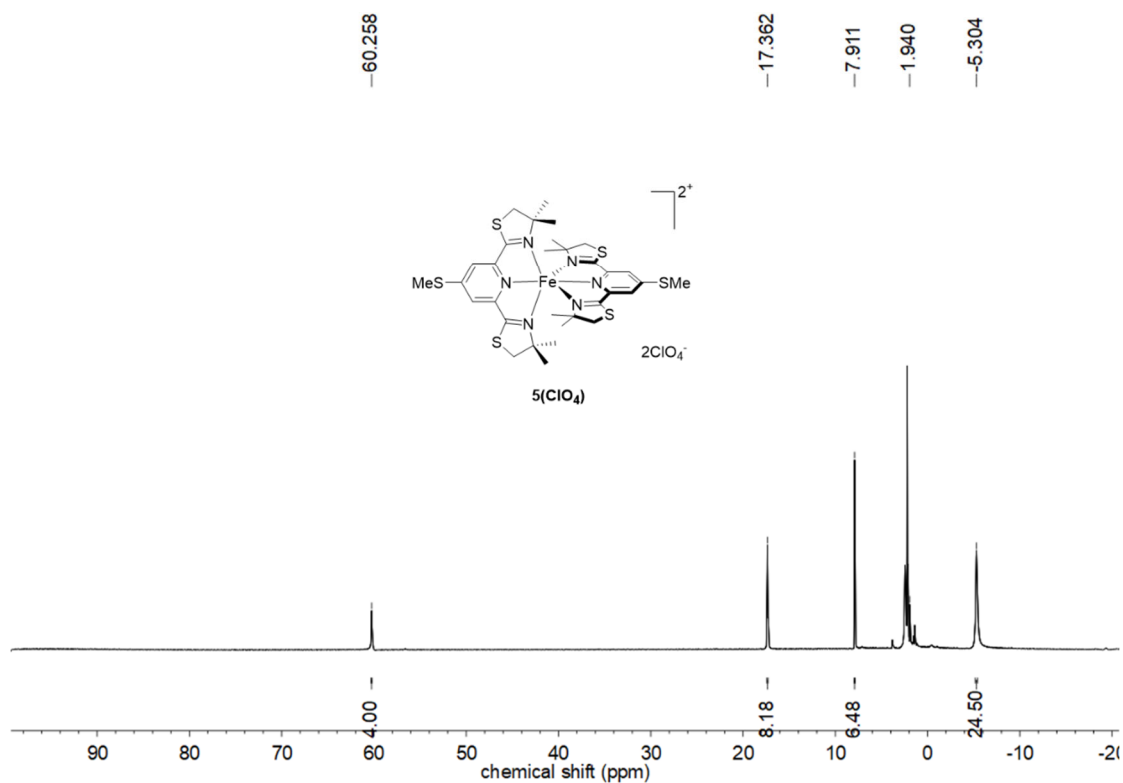

**Fig. S23**  $^1\text{H}$  NMR spectrum of  $5(\text{ClO}_4)$  (400 MHz) in  $\text{CD}_3\text{CN}$  at 293 K.

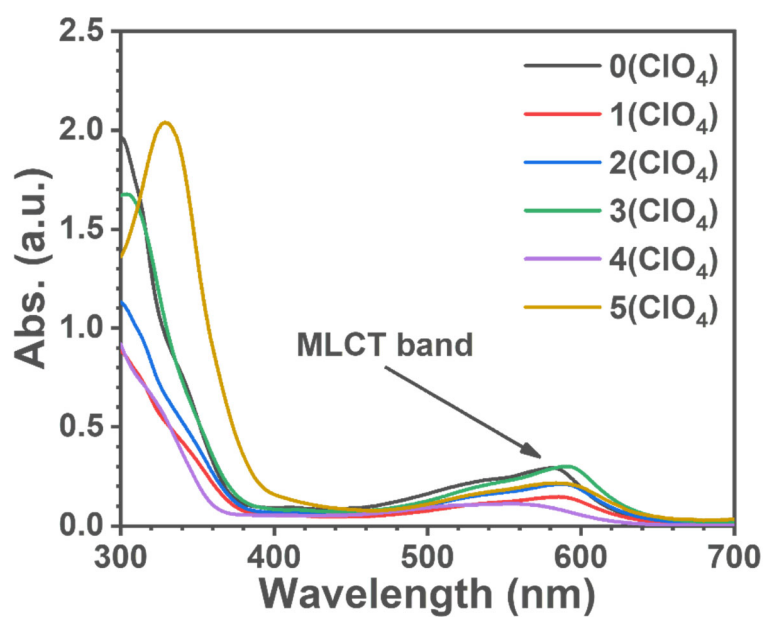

**Fig. S24** The UV-vis spectra of six  $[\text{Fe}(\text{thio-pybox})_2]^{2+}(\text{ClO}_4^-)_2$  type complexes in the  $1.0 \times 10^{-5}$  M acetonitrile solution at ambient temperature. The MLCT absorption peaks are 581 nm for  $0(\text{ClO}_4)$ , 585 nm for  $1(\text{ClO}_4)$ , 588 nm for  $2(\text{ClO}_4)$ , 591 nm for  $3(\text{ClO}_4)$ , 547 nm for  $4(\text{ClO}_4)$ , and 578 nm for  $5(\text{ClO}_4)$ , respectively.

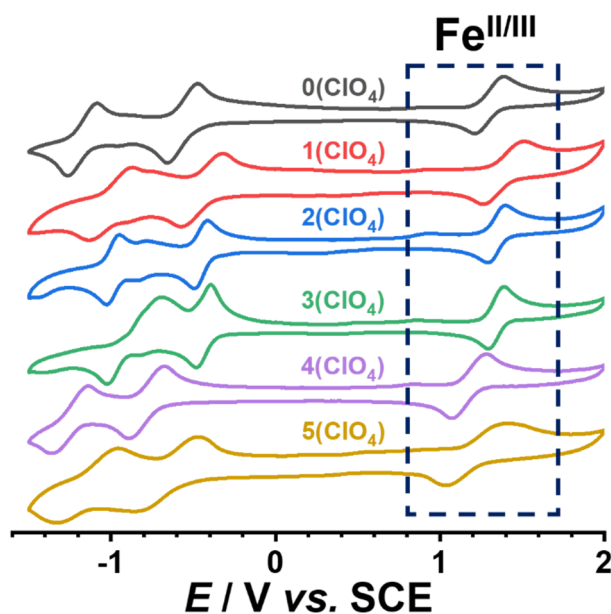

**Fig. S25** Cyclic voltammograms of six complexes in 1 mM acetonitrile solution, which give the  $E_{1/2}$  values of reversible  $\text{Fe}^{\text{II/III}}$  redox process as 1.29 V for **0(ClO<sub>4</sub>)**, 1.38 V for **1(ClO<sub>4</sub>)**, 1.34 V for **2(ClO<sub>4</sub>)**, 1.33 V for **3(ClO<sub>4</sub>)**, 1.17 V for **4(ClO<sub>4</sub>)**, and 1.19 V for **5(ClO<sub>4</sub>)**, respectively. Reference is saturated calomel electrode (SCE) and the scan rate is 400  $\text{mV s}^{-1}$ .

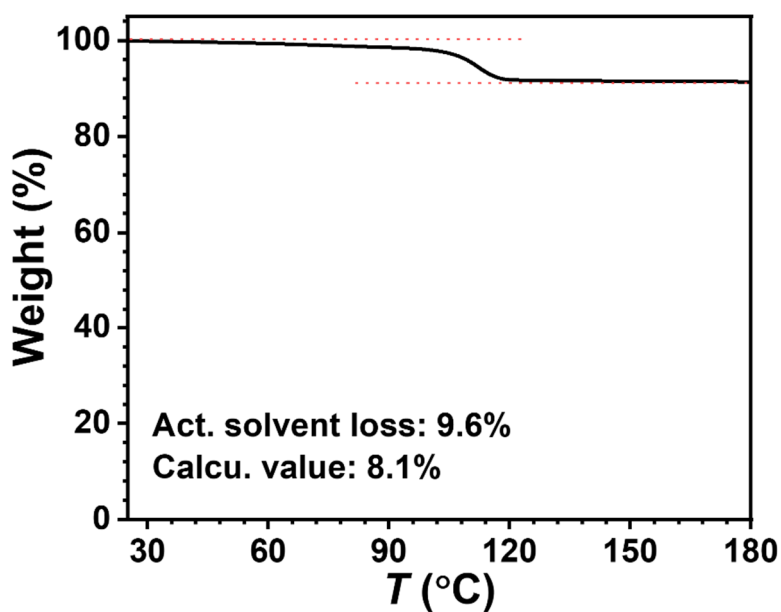

**Fig. S26** The TGA trace of **1(ClO<sub>4</sub>)** upon heating to 180 °C, and the weight loss indicates the removal of lattice solvents (about 2 acetonitrile per complex).

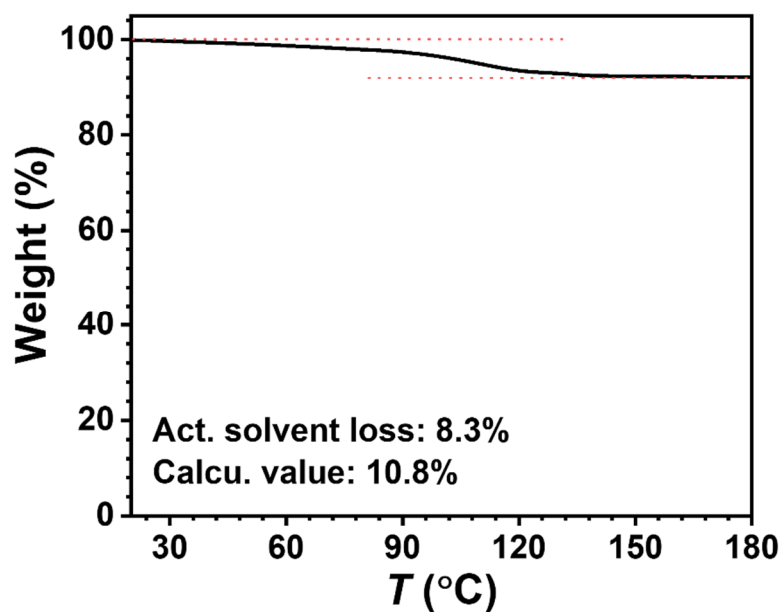

**Fig. S27** The TGA trace of  $2(\text{ClO}_4)$  upon heating to 180 °C, and the weight loss indicates the removal of lattice solvents (about 1 acetonitrile and 1 ether per complex).

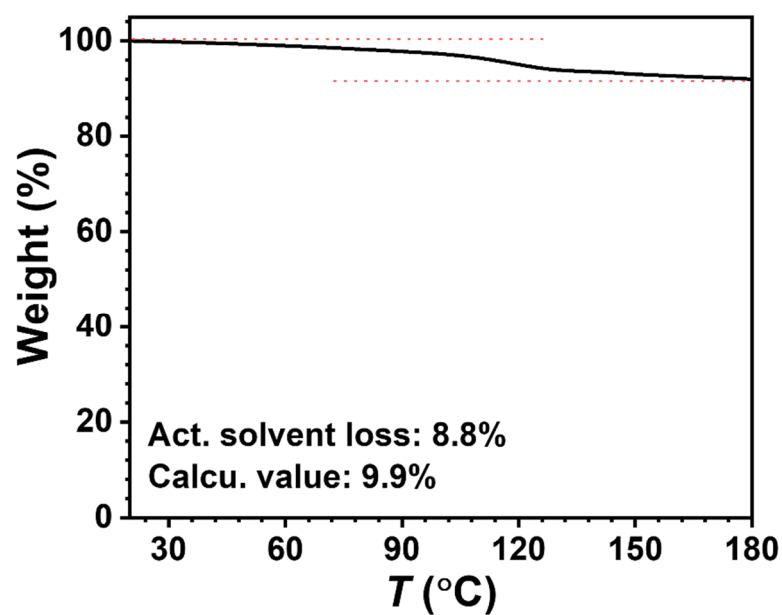

**Fig. S28** The TGA trace of  $3(\text{ClO}_4)$  upon heating to 180 °C, and the weight loss indicates the removal of lattice solvent (about 3 acetonitrile per complex).

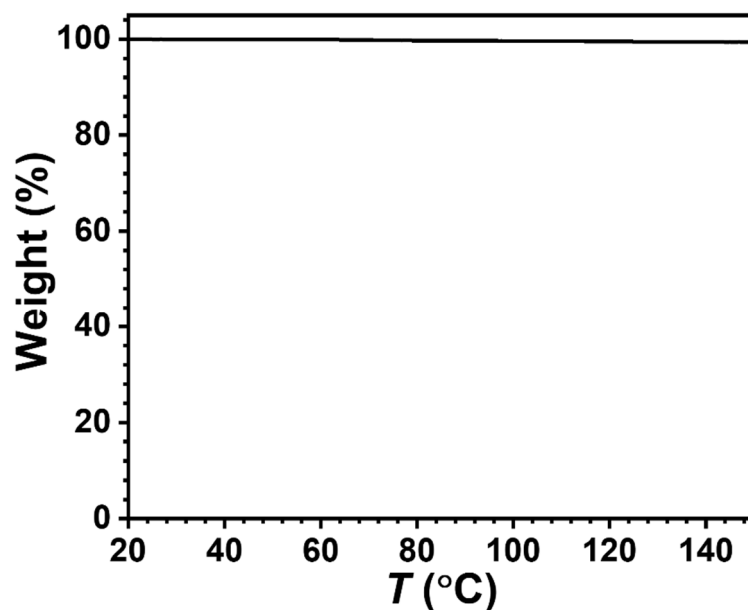

**Fig. S29** The TGA trace of 4(ClO<sub>4</sub>) upon heating to 150 °C, and the no weight loss is consistent with that observed from single crystal X-ray structure.

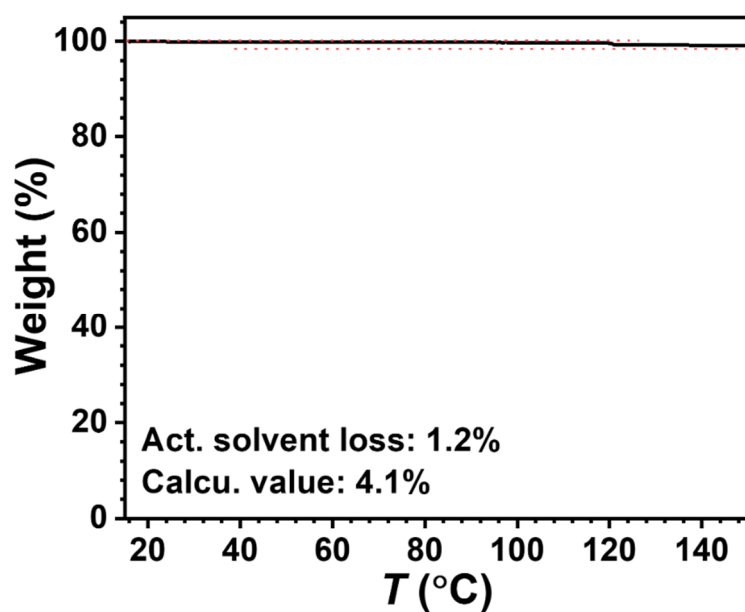

**Fig. S30** The TGA trace of 5(ClO<sub>4</sub>) upon heating to 150 °C. According to the structure from single crystal X-ray structure, there is one acetonitrile lattice solvent per complex. The observed weight loss is considerably lower than the theoretical value which is due to the rapid solvent loss when the crystals are taken out from the mother liquid.



## SI2 Structural details of the complexes

**Table S1** Crystal data, data collection, solution, and refinement information of complexes in this work

|                                                   | 1(ClO <sub>4</sub> )                                                                                 | 2(ClO <sub>4</sub> )                                                                                           | 3(ClO <sub>4</sub> )                                                                                          | 4(ClO <sub>4</sub> )                                                                            | 5(ClO <sub>4</sub> )                                                                           |
|---------------------------------------------------|------------------------------------------------------------------------------------------------------|----------------------------------------------------------------------------------------------------------------|---------------------------------------------------------------------------------------------------------------|-------------------------------------------------------------------------------------------------|------------------------------------------------------------------------------------------------|
| Formula                                           | C <sub>31.50</sub> H <sub>39</sub> Cl <sub>4</sub> FeN <sub>6.75</sub> O <sub>8</sub> S <sub>4</sub> | C <sub>30</sub> H <sub>36</sub> Br <sub>2</sub> Cl <sub>2</sub> FeN <sub>6</sub> O <sub>8</sub> S <sub>4</sub> | C <sub>30</sub> H <sub>36</sub> Cl <sub>2</sub> FeI <sub>2</sub> N <sub>6</sub> O <sub>8</sub> S <sub>4</sub> | C <sub>32</sub> H <sub>42</sub> Cl <sub>2</sub> FeN <sub>6</sub> O <sub>10</sub> S <sub>4</sub> | C <sub>34</sub> H <sub>45</sub> Cl <sub>2</sub> FeN <sub>7</sub> O <sub>8</sub> S <sub>6</sub> |
| formula weight                                    | 966.08                                                                                               | 1023.46                                                                                                        | 1117.44                                                                                                       | 925.71                                                                                          | 998.88                                                                                         |
| crystal system                                    | <i>Pcca</i>                                                                                          | <i>Pcca</i>                                                                                                    | <i>Pcca</i>                                                                                                   | <i>P2<sub>1</sub>/c</i>                                                                         | <i>P2<sub>1</sub>/c</i>                                                                        |
| space group                                       | orthorhombic                                                                                         | orthorhombic                                                                                                   | orthorhombic                                                                                                  | monoclinic                                                                                      | monoclinic                                                                                     |
| <i>a</i> , Å                                      | 19.0094(9)                                                                                           | 19.0337(7)                                                                                                     | 19.1548(12)                                                                                                   | 9.9867(6)                                                                                       | 20.1136(10)                                                                                    |
| <i>b</i> , Å                                      | 11.1022(6)                                                                                           | 11.1991(3)                                                                                                     | 11.3494(7)                                                                                                    | 18.5365(14)                                                                                     | 14.9411(6)                                                                                     |
| <i>c</i> , Å                                      | 20.9788(11)                                                                                          | 21.0585(6)                                                                                                     | 21.0565(14)                                                                                                   | 21.3125(13)                                                                                     | 14.0387(6)                                                                                     |
| $\alpha$ , deg                                    | 90                                                                                                   | 90                                                                                                             | 90                                                                                                            | 90                                                                                              | 90                                                                                             |
| $\beta$ , deg                                     | 90                                                                                                   | 90                                                                                                             | 90                                                                                                            | 92.538(2)                                                                                       | 95.382(2)                                                                                      |
| $\gamma$ , deg                                    | 90                                                                                                   | 90                                                                                                             | 90                                                                                                            | 90                                                                                              | 90                                                                                             |
| <i>V</i> , Å <sup>3</sup>                         | 4427.5(4)                                                                                            | 4488.8(2)                                                                                                      | 4577.6(5)                                                                                                     | 3941.5(4)                                                                                       | 4200.3(3)                                                                                      |
| <i>Z</i>                                          | 4                                                                                                    | 4                                                                                                              | 4                                                                                                             | 4                                                                                               | 4                                                                                              |
| <i>T</i> , K                                      | 120.0 (2)                                                                                            | 120.0 (2)                                                                                                      | 153.0 (2)                                                                                                     | 120.0 (2)                                                                                       | 120.0 (2)                                                                                      |
| <i>F</i> (000)                                    | 1989                                                                                                 | 2064                                                                                                           | 2208                                                                                                          | 1920                                                                                            | 2072                                                                                           |
| <i>D<sub>c</sub></i> , g cm <sup>-3</sup>         | 1.449                                                                                                | 1.514                                                                                                          | 1.621                                                                                                         | 1.560                                                                                           | 1.580                                                                                          |
| $\mu$ , mm <sup>-1</sup>                          | 0.823                                                                                                | 2.470                                                                                                          | 2.025                                                                                                         | 0.793                                                                                           | 0.843                                                                                          |
| $\lambda$ , Å                                     | 0.71073                                                                                              | 0.71073                                                                                                        | 1.34139                                                                                                       | 0.71073                                                                                         | 0.71073                                                                                        |
| crystal size, mm <sup>3</sup>                     | 0.22 × 0.21 × 0.19                                                                                   | 0.26 × 0.24 × 0.22                                                                                             | 0.13 × 0.12 × 0.09                                                                                            | 0.30 × 0.25 × 0.2                                                                               | 0.28 × 0.25 × 0.22                                                                             |
| <i>T<sub>min</sub></i> and <i>T<sub>max</sub></i> | 0.6483, 0.7456                                                                                       | 0.5940, 0.7456                                                                                                 | 0.4055, 0.7512                                                                                                | 0.6198, 0.7456                                                                                  | 0.6532, 0.7456                                                                                 |
| $\theta_{\min}$ , $\theta_{\max}$ , deg           | 2.336, 27.296                                                                                        | 2.321, 26.841                                                                                                  | 3.652, 56.151                                                                                                 | 2.397, 27.448                                                                                   | 2.727, 26.271                                                                                  |
| no. total reflns.                                 | 28427                                                                                                | 28828                                                                                                          | 28128                                                                                                         | 48511                                                                                           | 30026                                                                                          |
| no. uniq. reflns, <i>R<sub>int</sub></i>          | 5075, 0.0451                                                                                         | 5152, 0.0518                                                                                                   | 4697, 0.1043                                                                                                  | 8962, 0.0562                                                                                    | 9645, 0.0641                                                                                   |
| no. obs. [ <i>I</i> ≥ 2 $\sigma$ ( <i>I</i> )]    | 3771                                                                                                 | 3633                                                                                                           | 2792                                                                                                          | 7397                                                                                            | 6046                                                                                           |
| no. params                                        | 268                                                                                                  | 247                                                                                                            | 248                                                                                                           | 510                                                                                             | 536                                                                                            |
| <i>R</i> 1 [ <i>I</i> ≥ 2 $\sigma$ ( <i>I</i> )]  | 0.0724                                                                                               | 0.0504                                                                                                         | 0.1145                                                                                                        | 0.0348                                                                                          | 0.0667                                                                                         |
| <i>wR</i> 2 (all data)                            | 0.2256                                                                                               | 0.1193                                                                                                         | 0.3706                                                                                                        | 0.0910                                                                                          | 0.1795                                                                                         |
| <i>S</i>                                          | 1.035                                                                                                | 1.086                                                                                                          | 1.297                                                                                                         | 1.023                                                                                           | 1.033                                                                                          |
| $\Delta\rho^a$ , e/Å <sup>3</sup>                 | 1.923, -1.096                                                                                        | 0.769, -1.260                                                                                                  | 2.592, -1.465                                                                                                 | 0.653, -0.519                                                                                   | 1.123, -0.735                                                                                  |
| max. and mean $\Delta/\sigma^b$                   | 0.000, 0.000                                                                                         | 0.001, 0.000                                                                                                   | 0.000, 0.000                                                                                                  | 0.001, 0.000                                                                                    | 0.000, 0.000                                                                                   |
| CCDC                                              | 2141555                                                                                              | 2141556                                                                                                        | 2141557                                                                                                       | 2141558                                                                                         | 2141559                                                                                        |

[a] Max and min residual density. [b] Max and mean shift/ $\sigma$ .

**Table S2** Selected bond lengths (Å) for the single crystal structures of **1-5**

| Fe1          |       | Fe2          |       | Fe3          |       | Fe4          |       | Fe5          |       |
|--------------|-------|--------------|-------|--------------|-------|--------------|-------|--------------|-------|
| <i>T</i> (K) | 120 K | <i>T</i> (K) | 120 K | <i>T</i> / K | 153 K | <i>T</i> / K | 120 K | <i>T</i> / K | 120 K |
| Fe-N1        | 2.233 | Fe-N1        | 2.262 | Fe-N1        | 2.266 | Fe-N1        | 2.250 | Fe-N1        | 2.289 |
| Fe-N2        | 2.077 | Fe-N2        | 2.077 | Fe-N2        | 2.084 | Fe-N2        | 2.083 | Fe-N2        | 2.090 |
| Fe-N3        | 2.262 | Fe-N3        | 2.236 | Fe-N3        | 2.227 | Fe-N3        | 2.230 | Fe-N3        | 2.234 |
| Fe-N1'       | 2.233 | Fe-N1'       | 2.262 | Fe-N1'       | 2.266 | Fe-N4        | 2.233 | Fe-N4        | 2.228 |
| Fe-N2'       | 2.077 | Fe-N2'       | 2.077 | Fe-N2'       | 2.084 | Fe-N5        | 2.086 | Fe-N5        | 2.087 |
| Fe-N3'       | 2.262 | Fe-N3'       | 2.236 | Fe-N3'       | 2.227 | Fe-N6        | 2.240 | Fe-N6        | 2.265 |

**Table S3** Summary of the structural parameters and spin state in the family of compounds reported in this work.

| Entry | <i>T</i> (K) | $\Sigma$ (°) | $\theta$ (°) | $\phi$ (°) | Fe-N <sub>av</sub> (Å) | <i>S</i> ( <i>O<sub>h</sub></i> ) | <i>S</i> ( <i>T<sub>h</sub></i> ) | Spin state | $\mu_{\text{rms}}$ |
|-------|--------------|--------------|--------------|------------|------------------------|-----------------------------------|-----------------------------------|------------|--------------------|
| Fe1   | 120          | 137.855      | 85.627       | 174.599    | 2.191                  | 4.942                             | 6.923                             | HS         | 0.402              |
| Fe2   | 120          | 127.461      | 85.581       | 174.049    | 2.192                  | 4.990                             | 6.925                             | HS         | 0.415              |
| Fe3   | 153          | 139.921      | 85.477       | 173.627    | 2.192                  | 5.055                             | 6.900                             | HS         | 0.472              |
| Fe4   | 120          | 139.991      | 88.956       | 174.552    | 2.187                  | 5.087                             | 6.586                             | HS         | 0.294              |
| Fe5   | 120          | 141.881      | 89.432       | 171.709    | 2.199                  | 5.263                             | 6.494                             | HS         | 0.214              |

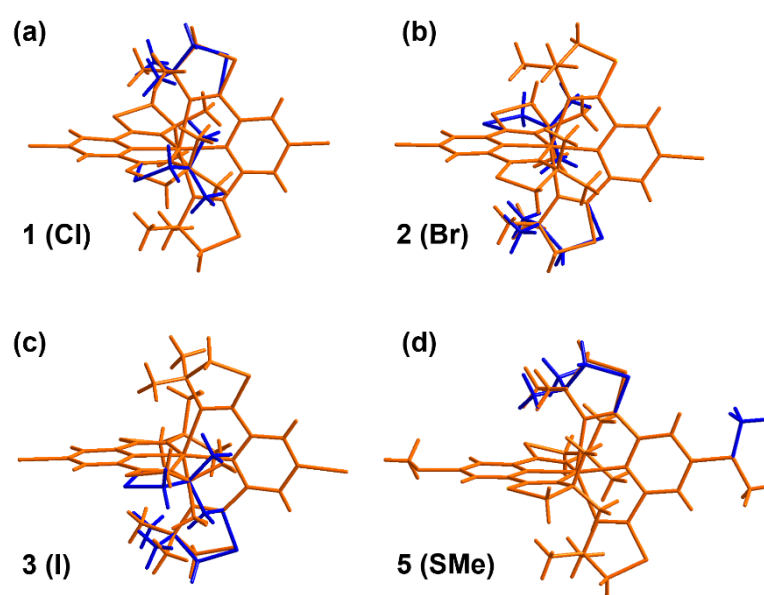**Fig. S31** The position disorder in complex cation of (a) **1(ClO<sub>4</sub>)**, (b) **2(ClO<sub>4</sub>)**, (c) **3(ClO<sub>4</sub>)**, and **5(ClO<sub>4</sub>)**.

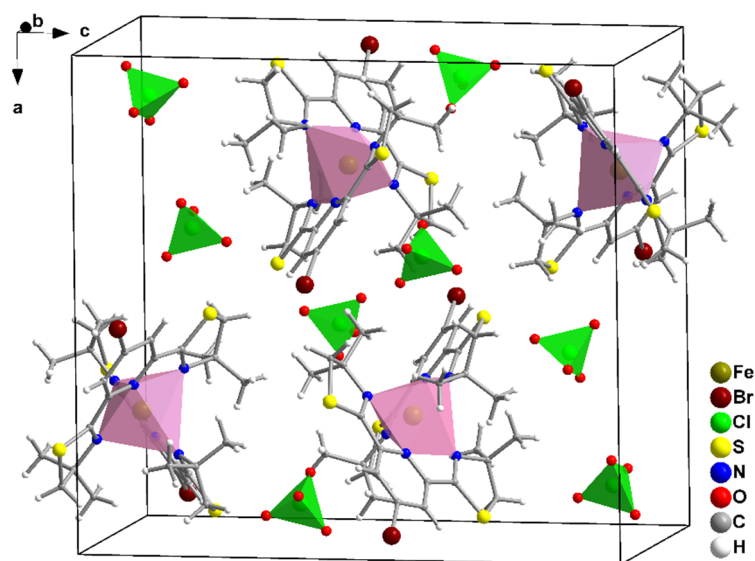

**Fig. S32** View of the packing diagram of  $2(\text{C}_{10}\text{H}_8\text{N}_2\text{S}_2\text{BrClO}_4)$  in a unit cell, the lattice solvents are omitted for clarity.

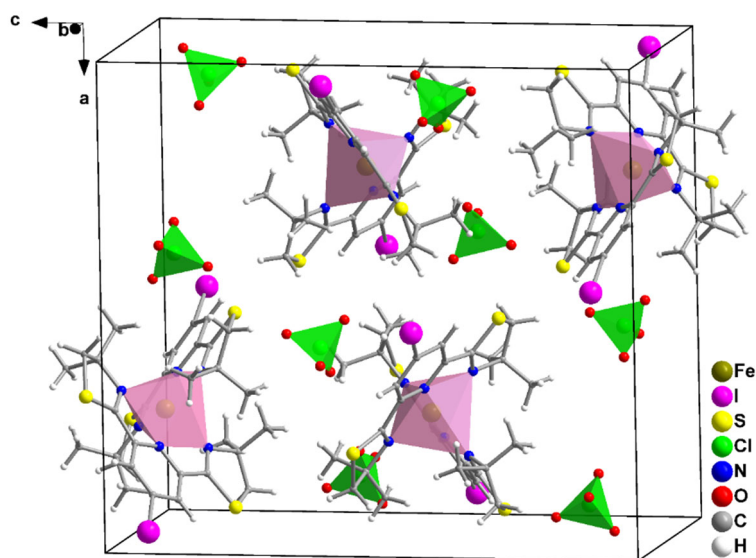

**Fig. S33** View of the packing diagram of  $3(\text{C}_{10}\text{H}_8\text{N}_2\text{S}_2\text{BrClO}_4)$  in a unit cell, the lattice solvents are omitted for clarity.

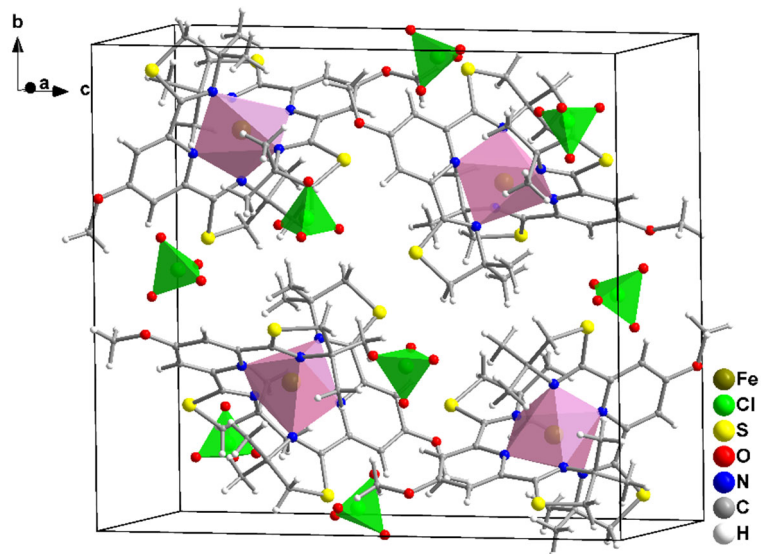

**Fig. S34** View of the packing diagram of  $4(\text{ClO}_4)$  in a unit cell, the lattice solvents are omitted for clarity.

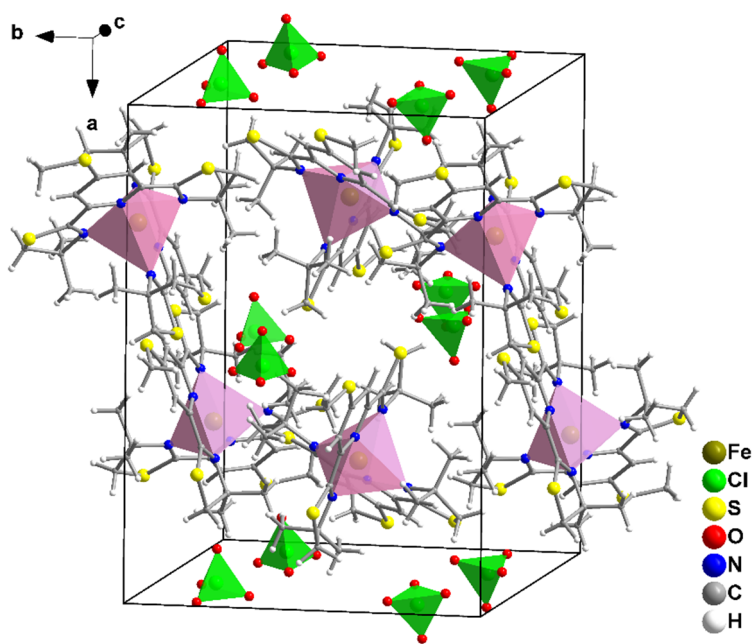

**Fig. S35** View of the packing diagram of  $5(\text{ClO}_4)$  in a unit cell, the lattice solvents are omitted for clarity.

## SI3 Supplementary magnetic properties

### SI3.1 Solid-state magnetic properties

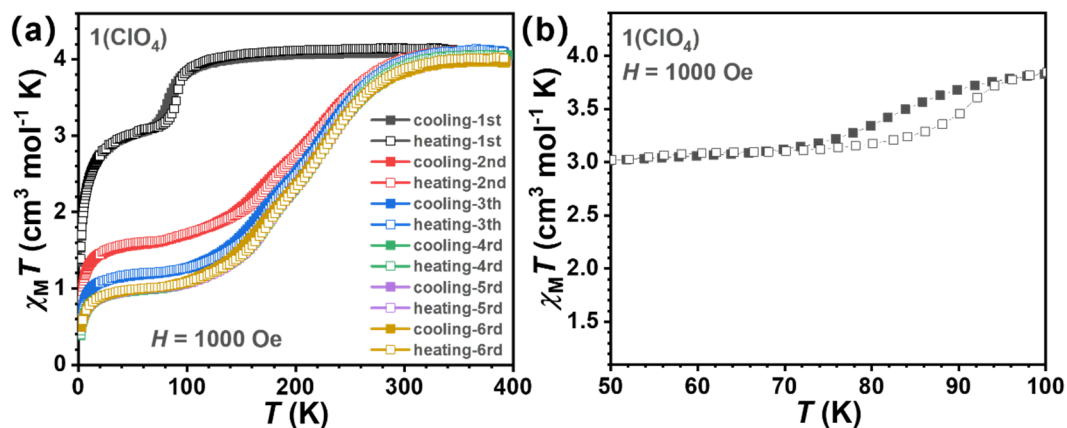

Fig. S36 The complete measurement scanning of variable-temperature susceptibilities for  $1(\text{ClO}_4)$ , which shows the lattice solvent-dependent spin transition behavior.

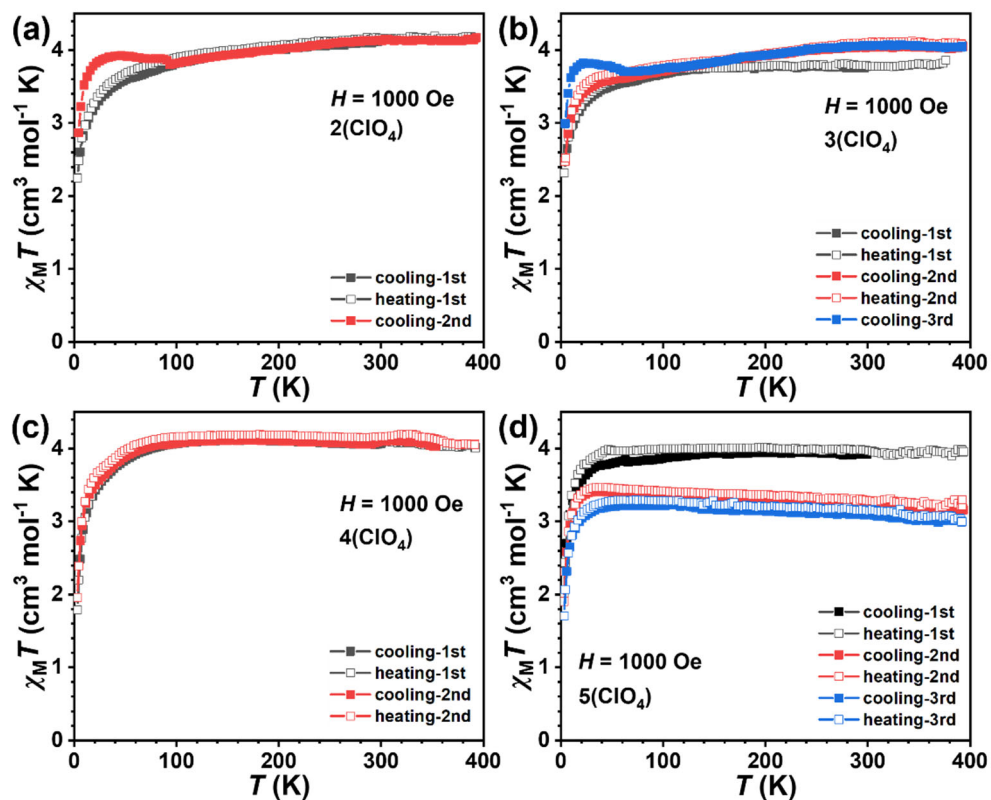

Fig. S37 Temperature dependence of  $\chi_M T$  for (a)  $2(\text{ClO}_4)$ , (b)  $3(\text{ClO}_4)$ , (c)  $4(\text{ClO}_4)$ , and (d)  $5(\text{ClO}_4)$  upon successive scanning.

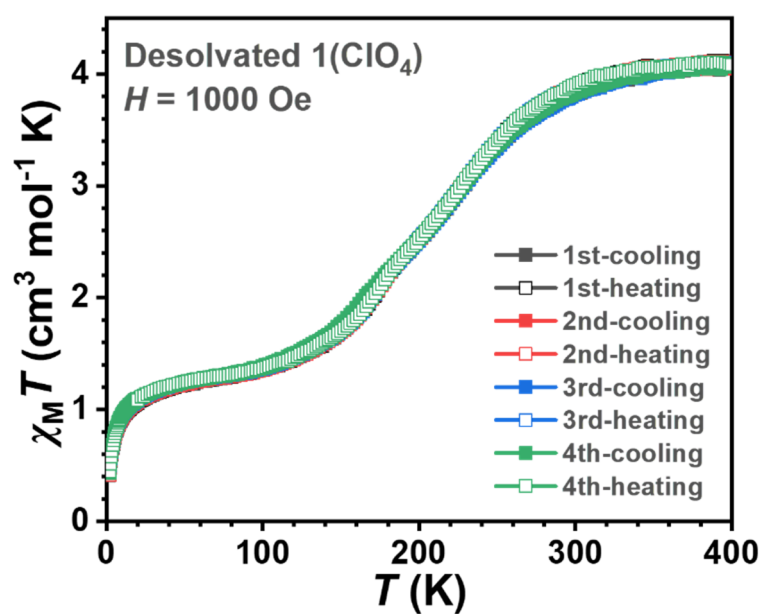

**Fig. S38** Temperature dependence of  $\chi_M T$  for desolvated  $1(\text{ClO}_4)$  upon successive four scanning cycles.

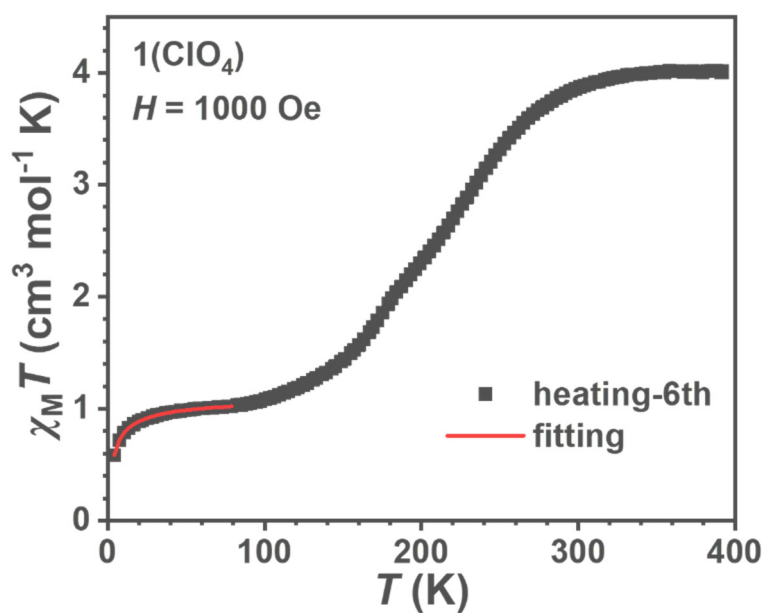

**Fig. S39** Experimental dc magnetic data (plot, the 6th heating semi-cycle) together with fitting curves using program PHI (solid red line) for complex  $1(\text{ClO}_4)$ . Fitting parameters:  $S = 2$ ,  $g = 2.32$ ,  $D = -13.14 \text{ cm}^{-1}$ ,  $E = 4.83 \text{ cm}^{-1}$ .

## SI3.2 Solution-state magnetic properties

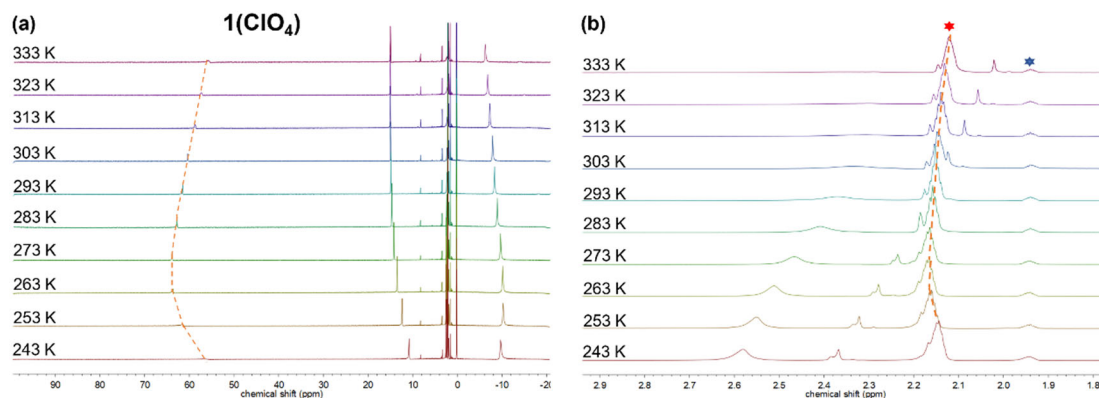

**Fig. S40** (a) Stacked spectra, obtained by the Evans'  $^1\text{H}$  NMR method, from 243 to 333 K for **1(ClO<sub>4</sub>)** ( $5.0 \times 10^{-3}$  mol  $\text{L}^{-1}$ ) in  $\text{CD}_3\text{CN}$  (400 MHz); (b) The enlarged region of solvent residual peaks (\* represent the solvent residual signals).

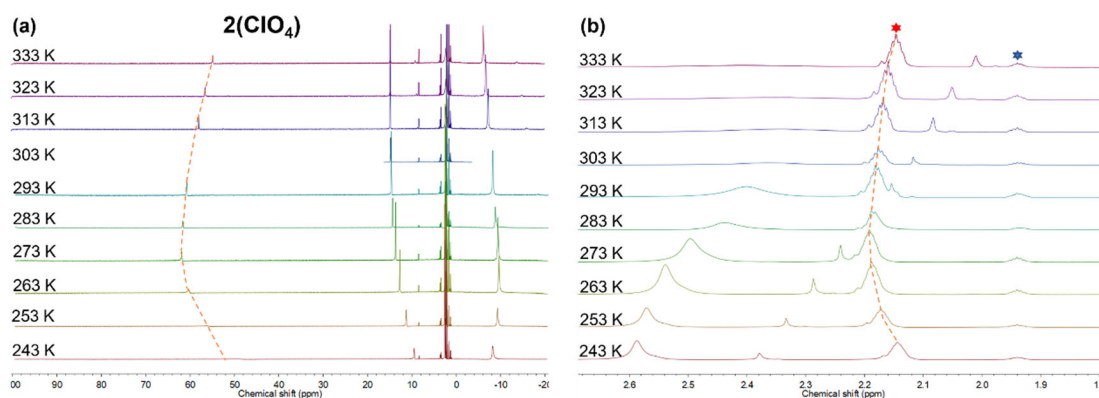

**Fig. S41** (a) Stacked spectra, obtained by the Evans'  $^1\text{H}$  NMR method, from 243 to 333 K for **2(ClO<sub>4</sub>)** ( $5.0 \times 10^{-3}$  mol  $\text{L}^{-1}$ ) in  $\text{CD}_3\text{CN}$  (400 MHz); (b) The enlarged region of solvent residual peaks (\* represent the solvent residual signals).

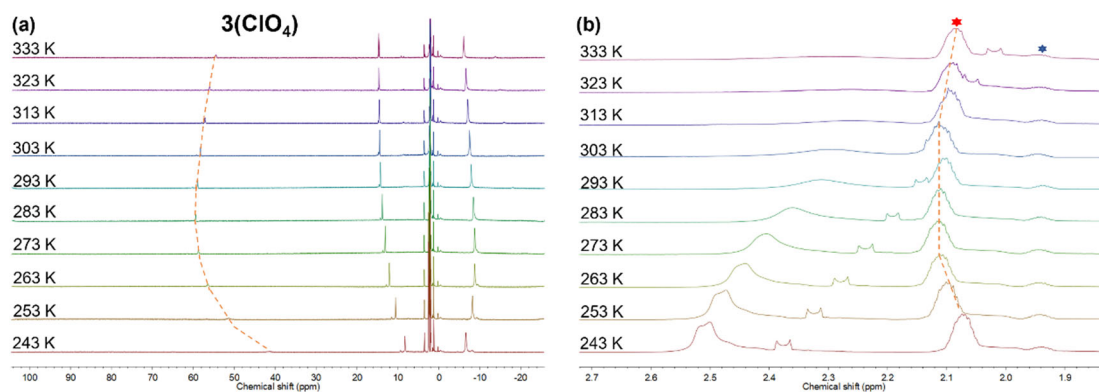

**Fig. S42** (a) Stacked spectra, obtained by the Evans'  $^1\text{H}$  NMR method, from 243 to 333 K for  $3(\text{ClO}_4)$  ( $5.0 \times 10^{-3} \text{ mol L}^{-1}$ ) in  $\text{CD}_3\text{CN}$  (400 MHz); (b) The enlarged region of solvent residual peaks (\* represent the solvent residual signals).

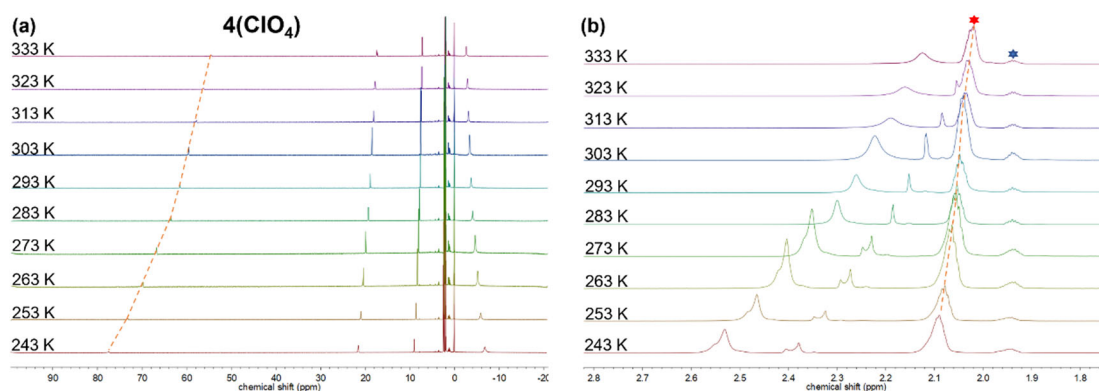

**Fig. S43** (a) Stacked spectra, obtained by the Evans'  $^1\text{H}$  NMR method, from 243 to 333 K for  $4(\text{ClO}_4)$  ( $5.0 \times 10^{-3} \text{ mol L}^{-1}$ ) in  $\text{CD}_3\text{CN}$  (400 MHz); (b) The enlarged region of solvent residual peaks (\* represent the solvent residual signals).



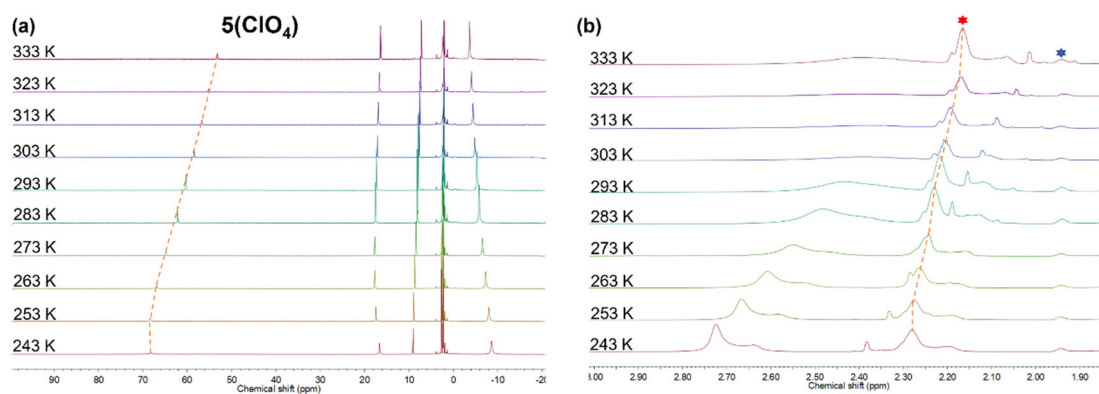

**Fig. S44** (a) Stacked spectra, obtained by the Evans'  $^1\text{H}$  NMR method, from 243 to 333 K for  $5(\text{ClO}_4)$  ( $5.0 \times 10^{-3} \text{ mol L}^{-1}$ ) in  $\text{CD}_3\text{CN}$  (400 MHz); (b) The enlarged region of solvent residual peaks (\* represent the solvent residual signals).

**Table S4** The calculated  $\chi_{MT}$  values of six complexes at multiple temperatures according to the Evans' method (equation 1).

| $T$ (K)           | 243   | 253   | 263   | 273   | 283   | 293   | 303   | 313   | 323   | 333   |
|-------------------|-------|-------|-------|-------|-------|-------|-------|-------|-------|-------|
| $0(\text{ClO}_4)$ | 2.435 | 2.903 | 3.345 | 3.756 | 3.814 | 3.815 | 3.848 | 3.851 | /     | /     |
| $1(\text{ClO}_4)$ | 3.040 | 3.378 | 3.584 | 3.705 | 3.749 | 3.781 | 3.853 | 3.843 | 3.840 | 3.847 |
| $2(\text{ClO}_4)$ | 2.883 | 3.253 | 3.514 | 3.701 | 3.799 | 3.833 | 3.883 | 3.892 | 3.885 | 3.855 |
| $3(\text{ClO}_4)$ | 2.553 | 3.072 | 3.417 | 3.606 | 3.702 | 3.757 | 3.849 | 3.845 | 3.846 | 3.837 |
| $4(\text{ClO}_4)$ | 3.867 | 3.872 | 3.838 | 3.850 | 3.865 | 3.840 | 3.827 | 3.859 | 3.844 | 3.864 |
| $5(\text{ClO}_4)$ | 3.871 | 3.880 | 3.883 | 3.886 | 3.880 | 3.873 | 3.884 | 3.891 | 3.874 | 3.886 |

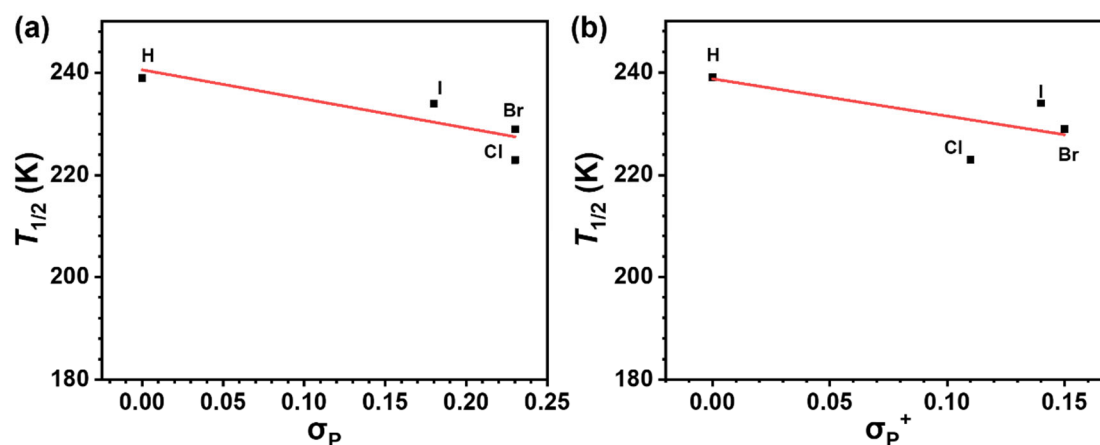

**Fig. S45** Plots of  $T_{1/2}$  vs. substituent Hammett parameters (a)  $\sigma_P$  and (b)  $\sigma_P^+$ .  $\sigma_P^+$  is a modified Hammett parameter that accounts for conjugation of the ligand substituents with a positively charged reaction center.<sup>1</sup>

## SI4 The details of DFT calculations

### SI4.1 Cartesian coordinates for the 12 optimized geometries

**Table S5** Cartesian coordinates for the optimized geometries of **0(CIO<sub>4</sub>)** in singlet state.

| Atom | x         | y         | z         | Atom | x         | y         | z         |
|------|-----------|-----------|-----------|------|-----------|-----------|-----------|
| Fe   | -0.011343 | 0.004092  | 0.001225  | H    | 3.607129  | 2.522174  | -1.952734 |
| N    | 1.403768  | 1.44339   | 0.465335  | H    | 2.099154  | 1.713908  | -2.334554 |
| N    | -0.03566  | -0.100256 | 1.898921  | H    | 0.528515  | 3.379559  | -1.200702 |
| N    | -1.417459 | -1.486356 | 0.270912  | H    | 1.9929    | 4.362635  | -1.208545 |
| N    | 1.466208  | -1.379358 | -0.425143 | H    | 1.073007  | 4.17162   | 0.287782  |
| N    | 0.031095  | 0.12911   | -1.894167 | H    | 3.738981  | 3.847235  | 0.502574  |
| N    | -1.521117 | 1.392622  | -0.312516 | H    | 4.26928   | 2.155285  | 0.572201  |
| C    | 2.256144  | 2.42924   | -0.283924 | H    | 1.430054  | 1.300102  | 4.582772  |
| C    | 1.571217  | 1.554443  | 1.745733  | C    | -0.062909 | -0.257679 | 4.649696  |
| C    | 0.759396  | 0.704753  | 2.619888  | H    | -1.548339 | -1.800728 | 4.375316  |
| C    | -0.840991 | -0.983751 | 2.508576  | H    | -3.666134 | -3.950744 | -0.029851 |
| C    | -1.616332 | -1.741514 | 1.525251  | H    | -4.258352 | -2.295175 | 0.201759  |
| C    | -2.210879 | -2.407023 | -0.608357 | H    | -0.43417  | -3.196498 | -1.586114 |
| C    | 2.430791  | -2.228198 | 0.352176  | H    | -1.852612 | -4.23623  | -1.704451 |
| C    | 1.656383  | -1.501052 | -1.701184 | H    | -0.960073 | -4.144981 | -0.183092 |
| C    | 0.869033  | -0.650275 | -2.594781 | H    | -3.32595  | -0.784078 | -1.537001 |
| C    | -0.775963 | 0.996749  | -2.523401 | H    | -3.489631 | -2.347298 | -2.338233 |
| C    | -1.653945 | 1.677407  | -1.569252 | H    | -2.009422 | -1.427187 | -2.542554 |
| C    | -2.46245  | 2.1969    | 0.537145  | H    | 4.162234  | -0.980377 | -0.112977 |
| C    | 2.851904  | 1.838538  | -1.556213 | H    | 4.322271  | -1.941522 | 1.359339  |
| C    | 1.405861  | 3.656888  | -0.615387 | H    | 3.297265  | -0.506932 | 1.361462  |
| C    | 3.409154  | 2.821242  | 0.665233  | H    | 1.602437  | -2.129189 | 2.36335   |
| S    | 2.761639  | 2.660065  | 2.363412  | H    | 2.470654  | -3.609163 | 2.000191  |
| C    | 0.776144  | 0.651172  | 4.010803  | H    | 0.856628  | -3.370469 | 1.330781  |
| C    | -0.886304 | -1.089195 | 3.894444  | H    | 2.234134  | -4.219699 | -0.570948 |
| S    | -2.788352 | -2.941189 | 1.979999  | H    | 3.91231   | -3.670471 | -0.39292  |
| C    | -3.377464 | -2.938531 | 0.252848  | H    | 1.60319   | -1.230536 | -4.538727 |
| C    | -1.304503 | -3.562399 | -1.04117  | H    | 0.108612  | 0.324258  | -4.641771 |
| C    | -2.785656 | -1.688563 | -1.82326  | H    | -1.419398 | 1.830879  | -4.406288 |
| C    | 3.621415  | -1.355871 | 0.75911   | H    | -0.831946 | 3.046581  | 1.697944  |
| C    | 1.79046   | -2.863703 | 1.580137  | H    | -2.34928  | 3.940464  | 1.806314  |
| C    | 2.892283  | -3.349177 | -0.603144 | H    | -1.357968 | 4.06829   | 0.34975   |
| S    | 2.815917  | -2.654472 | -2.288954 | H    | -3.526596 | 0.438794  | 1.260236  |

|   |           |           |           |   |           |           |           |
|---|-----------|-----------|-----------|---|-----------|-----------|-----------|
| C | 0.930053  | -0.587007 | -3.983179 | H | -3.895867 | 1.935156  | 2.117708  |
| C | -0.760549 | 1.127999  | -3.908606 | H | -2.373847 | 1.121356  | 2.429074  |
| S | -2.875098 | 2.807419  | -2.07114  | H | -3.958533 | 3.678225  | -0.098135 |
| C | -1.698761 | 3.382983  | 1.1277    | H | -4.430509 | 2.003536  | -0.439755 |
| C | -3.092559 | 1.362888  | 1.646383  | H | -0.073772 | -0.319194 | 5.732282  |
| C | -3.588578 | 2.697382  | -0.396446 | H | 0.138904  | 0.401299  | -5.722988 |
| H | 3.338696  | 0.880358  | -1.36886  |   |           |           |           |

**Table S6** Cartesian coordinates for the optimized geometries of **0(CIO<sub>4</sub>)** in quintet state.

| Atom | x         | y         | z         | Atom | x         | y         | z         |
|------|-----------|-----------|-----------|------|-----------|-----------|-----------|
| Fe   | -0.009506 | 0.001693  | -0.000608 | H    | 4.002327  | 2.10548   | 1.852378  |
| N    | 1.470495  | -0.20431  | 1.722933  | H    | 2.524396  | 2.273038  | 0.912613  |
| N    | -0.289702 | -1.940117 | 0.749246  | H    | 0.952839  | 2.140443  | 2.902038  |
| N    | -1.61729  | -0.906189 | -1.299423 | H    | 2.430214  | 2.260609  | 3.862828  |
| N    | 1.572539  | -0.196563 | -1.613733 | H    | 1.272057  | 0.964542  | 4.18817   |
| N    | 0.306628  | 1.952496  | -0.70331  | H    | 3.864724  | 0.202246  | 4.025468  |
| N    | -1.480697 | 1.298283  | 1.149888  | H    | 4.326592  | -0.513924 | 2.469433  |
| C    | 2.472592  | 0.680639  | 2.386353  | H    | 0.907495  | -4.005644 | 3.116838  |
| C    | 1.433531  | -1.377486 | 2.253446  | C    | -0.654014 | -4.49448  | 1.713449  |
| C    | 0.451304  | -2.374672 | 1.774001  | H    | -2.165744 | -4.673642 | 0.186481  |
| C    | -1.202661 | -2.73935  | 0.185477  | H    | -3.992952 | -1.526218 | -3.569598 |
| C    | -1.933851 | -2.097668 | -0.928087 | H    | -4.506281 | -0.897742 | -1.992789 |
| C    | -2.400241 | -0.45639  | -2.484612 | H    | -0.5869   | -0.145139 | -3.637402 |
| C    | 2.428323  | -1.299904 | -2.138088 | H    | -2.050718 | -0.293025 | -4.616034 |
| C    | 1.858779  | 0.936712  | -2.154971 | H    | -1.331329 | -1.735658 | -3.892011 |
| C    | 1.200394  | 2.170743  | -1.674279 | H    | -3.317828 | 1.200555  | -1.414    |
| C    | -0.382974 | 2.968884  | -0.174195 | H    | -3.44543  | 1.303666  | -3.173645 |
| C    | -1.384071 | 2.541206  | 0.827742  | H    | -1.908548 | 1.656107  | -2.390613 |
| C    | -2.519846 | 1.06135   | 2.192624  | H    | 4.236981  | -0.60936  | -1.12897  |
| C    | 3.201071  | 1.545229  | 1.364009  | H    | 4.20738   | -2.341829 | -1.474719 |
| C    | 1.732984  | 1.559806  | 3.396807  | H    | 3.223661  | -1.694733 | -0.157288 |
| C    | 3.482535  | -0.241671 | 3.106261  | H    | 1.328447  | -2.972802 | -1.302011 |
| S    | 2.575019  | -1.772501 | 3.511705  | H    | 2.247954  | -3.361509 | -2.751423 |
| C    | 0.298067  | -3.659672 | 2.289432  | H    | 0.742065  | -2.448213 | -2.89266  |
| C    | -1.418875 | -4.035459 | 0.645459  | H    | 2.271564  | -1.121648 | -4.33178  |
| S    | -3.238965 | -2.9162   | -1.744953 | H    | 3.940043  | -1.23637  | -3.738553 |
| C    | -3.671882 | -1.333714 | -2.545878 | H    | 2.171023  | 3.619341  | -2.950682 |
| C    | -1.536915 | -0.674525 | -3.730136 | H    | 0.761304  | 4.519527  | -1.590096 |
| C    | -2.788754 | 1.011648  | -2.350408 | H    | -0.737952 | 5.100847  | -0.154461 |
| C    | 3.5941    | -1.492412 | -1.163835 | H    | -1.07094  | 0.125581  | 3.510202  |
| C    | 1.632573  | -2.591904 | -2.278957 | H    | -2.545299 | 0.667473  | 4.319798  |

|   |           |           |           |   |           |           |           |
|---|-----------|-----------|-----------|---|-----------|-----------|-----------|
| C | 2.946687  | -0.844491 | -3.519642 | H | -1.321381 | 1.848219  | 3.836897  |
| S | 3.022301  | 0.979172  | -3.453894 | H | -3.752211 | -0.151701 | 0.871346  |
| C | 1.453452  | 3.452802  | -2.154992 | H | -4.145702 | -0.302128 | 2.587471  |
| C | -0.176112 | 4.282044  | -0.589887 | H | -2.704105 | -1.089346 | 1.954409  |
| S | -2.475341 | 3.69112   | 1.554806  | H | -3.820458 | 2.535109  | 3.191505  |
| C | -1.817906 | 0.920549  | 3.544418  | H | -4.316741 | 2.161702  | 1.531012  |
| C | -3.324088 | -0.194603 | 1.874918  | H | -0.797964 | -5.499905 | 2.093843  |
| C | -3.458095 | 2.292203  | 2.192638  | H | 0.942813  | 5.531027  | -1.936864 |
| H | 3.646549  | 0.940237  | 0.57291   |   |           |           |           |

**Table S7** Cartesian coordinates for the optimized geometries of **1(CIO<sub>4</sub>)** in singlet state.

| Atom | x         | y         | z         | Atom | x         | y         | z         |
|------|-----------|-----------|-----------|------|-----------|-----------|-----------|
| Fe   | 0         | 0         | -0.000033 | H    | 1.572387  | -2.152635 | 4.138045  |
| N    | -0.372396 | -1.467395 | 1.415876  | H    | 0.084652  | -1.199884 | 4.120439  |
| N    | 0.372393  | 1.467389  | 1.415882  | H    | 1.326798  | -3.446605 | 0.640294  |
| N    | -1.898784 | 0.000023  | -0.000045 | H    | 2.087818  | -3.739602 | 2.204152  |
| N    | 1.898784  | -0.000024 | -0.000041 | H    | 2.404178  | -2.232473 | 1.365181  |
| N    | -0.372346 | 1.467427  | -1.415928 | H    | -0.248902 | -3.829622 | 3.785195  |
| N    | 0.372349  | -1.467423 | -1.415932 | H    | -0.460488 | -4.358088 | 2.105687  |
| C    | 0.445158  | -2.356607 | 2.307642  | H    | -1.494216 | 0.668087  | 3.188533  |
| C    | -1.641675 | -1.627884 | 1.620755  | H    | -1.572397 | 2.15262   | 4.138049  |
| C    | -0.445163 | 2.356598  | 2.307649  | H    | -0.08466  | 1.19987   | 4.120444  |
| C    | 1.641671  | 1.627878  | 1.620764  | H    | -1.3268   | 3.446601  | 0.640303  |
| C    | -2.568014 | -0.798463 | 0.845034  | H    | -2.087825 | 3.739592  | 2.204159  |
| C    | -2.567984 | 0.798522  | -0.845136 | H    | -2.404181 | 2.232466  | 1.365182  |
| C    | 2.568012  | 0.798461  | 0.845041  | H    | 0.248894  | 3.829609  | 3.785208  |
| C    | 2.567986  | -0.798519 | -0.845134 | H    | 0.460482  | 4.358081  | 2.105703  |
| C    | -1.641618 | 1.627953  | -1.620815 | H    | -4.488913 | -1.480922 | 1.561513  |
| C    | 0.445245  | 2.35676   | -2.307548 | C    | -4.654552 | 0.000041  | -0.000076 |
| C    | 1.641621  | -1.627948 | -1.620817 | H    | -4.48886  | 1.481014  | -1.561649 |
| C    | -0.44524  | -2.356754 | -2.307557 | H    | 4.48891   | 1.480919  | 1.561526  |
| C    | 0.922284  | -1.539605 | 3.508802  | C    | 4.654552  | -0.00004  | -0.000067 |
| C    | 1.631099  | -2.971555 | 1.574654  | H    | 4.488864  | -1.481007 | -1.561646 |
| C    | -0.488134 | -3.496268 | 2.775529  | H    | 1.494349  | 0.668383  | -3.18862  |
| S    | -2.186247 | -2.829338 | 2.750418  | H    | 1.572672  | 2.153086  | -4.137857 |
| C    | -0.922292 | 1.539592  | 3.508806  | H    | 0.084909  | 1.200379  | -4.120589 |
| C    | -1.631103 | 2.971547  | 1.574661  | H    | 1.326741  | 3.446563  | -0.639998 |
| C    | 0.488127  | 3.496258  | 2.775541  | H    | 2.08786   | 3.739791  | -2.203765 |
| S    | 2.18624   | 2.829329  | 2.750432  | H    | 2.404206  | 2.232559  | -1.364973 |
| C    | -3.955436 | -0.828092 | 0.880605  | H    | -0.248762 | 3.829947  | -3.784953 |
| C    | -3.955405 | 0.828171  | -0.880738 | H    | -0.460451 | 4.358198  | -2.105391 |

|   |           |           |           |    |           |           |           |
|---|-----------|-----------|-----------|----|-----------|-----------|-----------|
| C | 3.955433  | 0.828091  | 0.880615  | H  | -1.494344 | -0.668374 | -3.188625 |
| C | 3.955407  | -0.828166 | -0.880733 | H  | -1.572663 | -2.153073 | -4.137868 |
| S | -2.186143 | 2.829492  | -2.750407 | H  | -0.084901 | -1.200364 | -4.120593 |
| C | 0.922483  | 1.539959  | -3.508797 | H  | -1.326738 | -3.446563 | -0.640013 |
| C | 1.63112   | 2.971646  | -1.574401 | H  | -2.087853 | -3.739786 | -2.203782 |
| C | -0.488043 | 3.496461  | -2.775342 | H  | -2.404203 | -2.232558 | -1.364986 |
| S | 2.18615   | -2.829481 | -2.750414 | H  | 0.248771  | -3.829934 | -3.784966 |
| C | -0.922476 | -1.539948 | -3.508804 | H  | 0.460457  | -4.358192 | -2.105406 |
| C | -1.631116 | -2.971644 | -1.574415 | Cl | -6.365443 | 0.000057  | -0.000092 |
| C | 0.48805   | -3.496452 | -2.775354 | Cl | 6.365443  | -0.000053 | -0.00008  |
| H | 1.49421   | -0.6681   | 3.188534  |    |           |           |           |

**Table S8** Cartesian coordinates for the optimized geometries of **1(CIO<sub>4</sub>)** in quintet state.

| Atom | x         | y         | z         | Atom | x         | y         | z         |
|------|-----------|-----------|-----------|------|-----------|-----------|-----------|
| Fe   | -0.000018 | -0.000013 | -0.000244 | H    | 1.146397  | -2.351378 | 4.339806  |
| N    | -0.602399 | -1.577922 | 1.52685   | H    | -0.308664 | -1.351526 | 4.24032   |
| N    | 0.602304  | 1.579741  | 1.525278  | H    | 1.059296  | -3.595415 | 0.805744  |
| N    | -2.09377  | -0.000556 | -0.000304 | H    | 1.801562  | -3.861307 | 2.387055  |
| N    | 2.093765  | 0.00055   | -0.000296 | H    | 2.089292  | -2.347923 | 1.535566  |
| N    | -0.602864 | 1.577833  | -1.526789 | H    | -0.719635 | -3.971914 | 3.855465  |
| N    | 0.602792  | -1.57967  | -1.525208 | H    | -0.80472  | -4.491265 | 2.162091  |
| C    | 0.122683  | -2.506422 | 2.440676  | H    | -1.167014 | 0.864245  | 3.391203  |
| C    | -1.880731 | -1.700304 | 1.619018  | H    | -1.146483 | 2.35653   | 4.337293  |
| C    | -0.122654 | 2.509354  | 2.438046  | H    | 0.308468  | 1.356402  | 4.238995  |
| C    | 1.880634  | 1.70213   | 1.617226  | H    | -1.059055 | 3.596653  | 0.801868  |
| C    | -2.762322 | -0.826119 | 0.81333   | H    | -1.801456 | 3.864284  | 2.382825  |
| C    | -2.762579 | 0.825263  | -0.813478 | H    | -2.08917  | 2.34999   | 1.532922  |
| C    | 2.762237  | 0.827014  | 0.812464  | H    | 0.719881  | 3.976229  | 3.851297  |
| C    | 2.762507  | -0.826162 | -0.812594 | H    | 0.804898  | 4.49385   | 2.157394  |
| C    | -1.881245 | 1.699551  | -1.619323 | H    | -4.685904 | -1.534109 | 1.505857  |
| C    | 0.122003  | 2.506416  | -2.440661 | C    | -4.850564 | -0.000231 | 0.00045   |
| C    | 1.881173  | -1.701383 | -1.617525 | H    | -4.68636  | 1.533785  | -1.504877 |
| C    | -0.121943 | -2.509349 | -2.438045 | H    | 4.68584   | 1.53572   | 1.504246  |
| C    | 0.553165  | -1.716222 | 3.677258  | C    | 4.850461  | 0.000235  | 0.00047   |
| C    | 1.336476  | -3.110272 | 1.743714  | H    | 4.686318  | -1.535385 | -1.503231 |
| C    | -0.866366 | -3.630528 | 2.830837  | H    | 1.167224  | 0.860362  | -3.39128  |
| S    | -2.541296 | -2.923365 | 2.670587  | H    | 1.146477  | 2.351363  | -4.339385 |
| C    | -0.553288 | 1.720572  | 3.675481  | H    | -0.30817  | 1.350871  | -4.240172 |
| C    | -1.336349 | 3.112535  | 1.740335  | H    | 1.057576  | 3.596258  | -0.805685 |
| C    | 0.866513  | 3.633787  | 2.827007  | H    | 1.799935  | 3.862448  | -2.386898 |
| S    | 2.541381  | 2.926331  | 2.667377  | H    | 2.088584  | 2.349395  | -1.535138 |

|   |           |           |           |    |           |           |           |
|---|-----------|-----------|-----------|----|-----------|-----------|-----------|
| C | -4.150465 | -0.859548 | 0.848163  | H  | -0.720643 | 3.971132  | -3.856074 |
| C | -4.150728 | 0.858998  | -0.847574 | H  | -0.806581 | 4.490814  | -2.162834 |
| C | 4.150378  | 0.860469  | 0.847279  | H  | -1.167395 | -0.864453 | -3.390396 |
| C | 4.150655  | -0.859914 | -0.846659 | H  | -1.146524 | -2.356478 | -4.336889 |
| S | -2.542124 | 2.921854  | -2.671567 | H  | 0.308014  | -1.355714 | -4.238838 |
| C | 0.553292  | 1.7161    | -3.6769   | H  | -1.057315 | -3.59754  | -0.801858 |
| C | 1.335259  | 3.111175  | -1.743541 | H  | -1.799796 | -3.865432 | -2.38273  |
| C | -0.867521 | 3.629899  | -2.831419 | H  | -2.088438 | -2.351491 | -1.532519 |
| S | 2.542243  | -2.924805 | -2.668366 | H  | 0.720935  | -3.975417 | -3.851946 |
| C | -0.553379 | -1.720428 | -3.675125 | H  | 0.806796  | -4.493403 | -2.158187 |
| C | -1.335106 | -3.113459 | -1.7402   | Cl | -6.559857 | -0.000036 | 0.000913  |
| C | 0.867705  | -3.633146 | -2.827622 | Cl | 6.559741  | 0.000047  | 0.00094   |
| H | 1.166806  | -0.860135 | 3.392074  |    |           |           |           |

**Table S9** Cartesian coordinates for the optimized geometries of **2(ClO<sub>4</sub>)** in singlet state.

| Atom | x         | y         | z         | Atom | x         | y         | z         |
|------|-----------|-----------|-----------|------|-----------|-----------|-----------|
| Br   | 6.555803  | 0.000053  | -0.000509 | C    | 1.605156  | 3.027281  | 1.590309  |
| C    | 4.677371  | 0.000164  | -0.000199 | C    | 0.940566  | 1.557917  | 3.528899  |
| C    | 3.975808  | -0.831251 | 0.881531  | C    | -0.519065 | 3.509749  | 2.828047  |
| C    | 3.975611  | 0.831623  | -0.881724 | S    | -2.225002 | -2.828151 | -2.777911 |
| C    | 2.582979  | -0.802619 | 0.847259  | C    | 0.940715  | -1.558068 | -3.528842 |
| H    | 4.508299  | -1.48558  | 1.562551  | C    | -0.518554 | -3.510105 | -2.827808 |
| C    | 2.582786  | 0.803129  | -0.847013 | C    | 1.60567   | -3.027198 | -1.590242 |
| H    | 4.507951  | 1.48586   | -1.56295  | H    | -2.383104 | -2.298803 | 1.35379   |
| N    | 1.909804  | 0.000364  | 0.000286  | H    | -2.060744 | -3.790535 | 2.229803  |
| C    | 1.659199  | -1.633155 | 1.633579  | H    | -1.276918 | -3.514497 | 0.667932  |
| C    | 1.658858  | 1.633568  | -1.63328  | H    | -0.113191 | -1.18319  | 4.137585  |
| Fe   | 0         | -0.000014 | 0.000339  | H    | -1.572316 | -2.187455 | 4.163904  |
| S    | 2.225403  | -2.82752  | 2.778321  | H    | -1.541046 | -0.70873  | 3.194603  |
| N    | 0.383064  | -1.48366  | 1.432782  | H    | -0.113237 | 1.18325   | -4.137258 |
| S    | 2.224993  | 2.828166  | -2.777868 | H    | -1.572272 | 2.187641  | -4.163997 |
| N    | 0.382748  | 1.483872  | -1.432652 | H    | -1.541365 | 0.708973  | -3.19457  |
| N    | -1.909803 | -0.000379 | 0.000273  | H    | -2.383152 | 2.298288  | -1.353149 |
| N    | -0.383064 | 1.483631  | 1.432775  | H    | -2.061825 | 3.789856  | -2.229826 |
| N    | -0.382749 | -1.483897 | -1.432664 | H    | -1.277532 | 3.514863  | -0.667985 |
| C    | 0.519078  | -3.50975  | 2.828096  | H    | -4.508299 | 1.485593  | 1.56251   |
| C    | -0.431539 | -2.381605 | 2.334481  | H    | -4.677371 | -0.000151 | -0.000239 |
| C    | 0.51854   | 3.510112  | -2.827749 | H    | -4.50795  | -1.485843 | -1.562994 |
| C    | -0.431885 | 2.381774  | -2.334278 | H    | 2.3831    | 2.298747  | 1.353743  |
| C    | -2.58298  | 0.802612  | 0.847238  | H    | 2.060765  | 3.790502  | 2.229727  |
| C    | -2.582785 | -0.803134 | -0.847036 | H    | 1.276919  | 3.514436  | 0.66787   |

|   |           |           |           |    |           |           |           |
|---|-----------|-----------|-----------|----|-----------|-----------|-----------|
| C | -1.659197 | 1.633143  | 1.633561  | H  | 0.113201  | 1.183213  | 4.137583  |
| C | 0.431545  | 2.381589  | 2.334453  | H  | 1.572332  | 2.18747   | 4.163873  |
| C | -1.658859 | -1.633575 | -1.633303 | H  | 1.541048  | 0.708725  | 3.194603  |
| C | 0.431878  | -2.381784 | -2.334314 | H  | -0.491092 | 4.387989  | 2.177092  |
| H | 0.491109  | -4.388003 | 2.177158  | H  | -0.284064 | 3.819986  | 3.847817  |
| H | 0.284079  | -3.819968 | 3.847873  | H  | 0.113227  | -1.183217 | -4.137264 |
| C | -1.60515  | -3.027324 | 1.590362  | H  | 1.572255  | -2.187617 | -4.164035 |
| C | -0.940557 | -1.557912 | 3.528912  | H  | 1.541363  | -0.708971 | -3.194575 |
| H | 0.490375  | 4.388328  | -2.176761 | H  | -0.490392 | -4.388336 | -2.17684  |
| H | 0.283592  | 3.820352  | -3.847527 | H  | -0.283609 | -3.820325 | -3.847593 |
| C | -0.940724 | 1.558082  | -3.528822 | H  | 2.383156  | -2.298343 | -1.353204 |
| C | -1.605676 | 3.027158  | -1.590179 | H  | 2.061804  | -3.789885 | -2.229914 |
| C | -3.975809 | 0.831257  | 0.881497  | H  | 1.277531  | -3.514923 | -0.668058 |
| C | -3.97561  | -0.831615 | -0.88176  | Br | -6.555803 | -0.000019 | -0.000571 |
| S | -2.225395 | 2.827527  | 2.778286  |    |           |           |           |

**Table S10** Cartesian coordinates for the optimized geometries of **2(ClO<sub>4</sub>)** in quintet state.

| Atom | x         | y         | z         | Atom | x         | y         | z         |
|------|-----------|-----------|-----------|------|-----------|-----------|-----------|
| Br   | 6.750866  | 0.000175  | -0.001247 | C    | 1.300943  | 3.214883  | 1.745215  |
| C    | 4.874247  | 0.000478  | -0.000542 | C    | 0.565232  | 1.740833  | 3.655079  |
| C    | 4.171463  | -0.887939 | 0.820129  | C    | -0.910178 | 3.662362  | 2.876728  |
| C    | 4.171119  | 0.888979  | -0.820831 | S    | -2.587264 | -2.9357   | -2.687367 |
| C    | 2.777703  | -0.849461 | 0.794482  | C    | 0.566362  | -1.740638 | -3.6543   |
| H    | 4.705171  | -1.587074 | 1.453762  | C    | -0.908307 | -3.662911 | -2.876389 |
| C    | 2.777384  | 0.850882  | -0.794152 | C    | 1.302314  | -3.214469 | -1.744285 |
| H    | 4.704538  | 1.587843  | -1.45501  | H    | -2.064879 | -2.472013 | 1.498588  |
| N    | 2.102907  | 0.000892  | 0.000476  | H    | -1.75995  | -3.950915 | 2.413172  |
| C    | 1.90385   | -1.736248 | 1.601501  | H    | -0.999399 | -3.729311 | 0.828127  |
| C    | 1.90312   | 1.73742   | -1.601027 | H    | 0.284949  | -1.332572 | 4.209768  |
| Fe   | 0.000001  | 0.000009  | 0.000616  | H    | -1.143429 | -2.376374 | 4.33364   |
| S    | 2.588658  | -2.93394  | 2.688028  | H    | -1.204327 | -0.911718 | 3.338663  |
| N    | 0.619399  | -1.64133  | 1.501545  | H    | 0.283903  | 1.332684  | -4.209086 |
| S    | 2.587266  | 2.935699  | -2.687366 | H    | -1.144869 | 2.375992  | -4.332767 |
| N    | 0.618767  | 1.641754  | -1.501052 | H    | -1.205071 | 0.911279  | -3.337778 |
| N    | -2.102906 | -0.000892 | 0.000476  | H    | -2.066241 | 2.471496  | -1.497993 |
| N    | -0.619401 | 1.641337  | 1.501548  | H    | -1.761351 | 3.950783  | -2.411908 |
| N    | -0.618761 | -1.641753 | -1.501061 | H    | -1.00071  | 3.728482  | -0.826968 |
| C    | 0.910166  | -3.662358 | 2.876723  | H    | -4.705173 | 1.587065  | 1.453765  |
| C    | -0.10109  | -2.562061 | 2.44032   | H    | -4.874244 | -0.000486 | -0.000541 |
| C    | 0.908309  | 3.662912  | -2.87638  | H    | -4.704532 | -1.587848 | -1.455012 |

|   |           |           |           |    |           |           |           |
|---|-----------|-----------|-----------|----|-----------|-----------|-----------|
| C | -0.102347 | 2.562057  | -2.439632 | H  | 2.06487   | 2.472032  | 1.498585  |
| C | -2.777703 | 0.849459  | 0.794483  | H  | 1.759939  | 3.950931  | 2.413174  |
| C | -2.77738  | -0.850883 | -0.794154 | H  | 0.999384  | 3.729328  | 0.82813   |
| C | -1.903853 | 1.736248  | 1.601504  | H  | -0.284947 | 1.332579  | 4.20977   |
| C | 0.101084  | 2.562071  | 2.440323  | H  | 1.143426  | 2.376387  | 4.333641  |
| C | -1.903114 | -1.737419 | -1.601031 | H  | 1.20433   | 0.911733  | 3.338663  |
| C | 0.10235   | -2.562055 | -2.439643 | H  | -0.856855 | 4.550742  | 2.24149   |
| H | 0.856838  | -4.550737 | 2.241484  | H  | -0.764633 | 3.963349  | 3.915918  |
| H | 0.76462   | -3.963346 | 3.915913  | H  | -0.283905 | -1.332681 | -4.209095 |
| C | -1.300954 | -3.214868 | 1.745214  | H  | 1.144866  | -2.37599  | -4.33278  |
| C | -0.565233 | -1.740822 | 3.655078  | H  | 1.205072  | -0.911278 | -3.337791 |
| H | 0.854336  | 4.551471  | -2.241453 | H  | -0.854331 | -4.551471 | -2.241464 |
| H | 0.762563  | 3.963416  | -3.915679 | H  | -0.762565 | -3.963412 | -3.91569  |
| C | -0.566362 | 1.740641  | -3.654289 | H  | 2.066245  | -2.471493 | -1.498008 |
| C | -1.302309 | 3.214471  | -1.744271 | H  | 1.761355  | -3.95078  | -2.411923 |
| C | -4.171463 | 0.887933  | 0.820131  | H  | 1.000716  | -3.728481 | -0.826982 |
| C | -4.171115 | -0.888984 | -0.820832 | Br | -6.750863 | -0.000188 | -0.001247 |
| S | -2.588666 | 2.933936  | 2.688032  |    |           |           |           |

**Table S11** Cartesian coordinates for the optimized geometries of **3(ClO<sub>4</sub>)** in singlet state.

| Atom | x         | y         | z         | Atom | x         | y         | z         |
|------|-----------|-----------|-----------|------|-----------|-----------|-----------|
| I    | 0.000227  | 6.805902  | -0.000179 | C    | -3.525851 | -0.567819 | 2.864004  |
| C    | 0.000134  | 4.697241  | -0.000075 | C    | -0.837657 | -3.99072  | 0.873786  |
| C    | 0.837657  | 3.99072   | 0.873786  | C    | 0.837441  | -3.990702 | -0.87387  |
| C    | -0.837441 | 3.990702  | -0.87387  | S    | 2.833483  | -2.268889 | -2.779325 |
| C    | 0.808815  | 2.595671  | 0.840825  | C    | 1.583191  | 0.915586  | -3.551824 |
| H    | 1.501535  | 4.512304  | 1.554091  | C    | 3.069753  | 1.565187  | -1.619726 |
| C    | -0.808724 | 2.595653  | -0.840766 | C    | 3.525836  | -0.567737 | -2.863775 |
| H    | -1.501247 | 4.512272  | -1.554257 | H    | 2.341778  | -2.336864 | 1.361646  |
| N    | 0         | 1.928705  | 0.000081  | H    | 3.822149  | -2.028858 | 2.26649   |
| C    | 1.645915  | 1.678174  | 1.636756  | H    | 3.571166  | -1.227108 | 0.708118  |
| C    | -1.645843 | 1.678144  | -1.636661 | H    | 1.192942  | -0.091575 | 4.155478  |
| Fe   | 0         | 0         | 0.000127  | H    | 2.213806  | -1.539659 | 4.193926  |
| S    | 2.833504  | 2.268951  | 2.779434  | H    | 0.744089  | -1.525294 | 3.208357  |
| N    | 1.511609  | 0.400372  | 1.457299  | H    | -1.192938 | -0.091384 | -4.155359 |
| S    | -2.833483 | 2.268889  | -2.779325 | H    | -2.213534 | -1.539668 | -4.193793 |
| N    | -1.511576 | 0.400357  | -1.457128 | H    | -0.743825 | -1.525005 | -3.208214 |
| N    | -1.511609 | -0.400372 | 1.457299  | H    | -2.341529 | -2.337004 | -1.361716 |
| N    | 0         | -1.928705 | 0.000081  | H    | -3.821999 | -2.028968 | -2.266388 |
| N    | 1.511576  | -0.400357 | -1.457128 | H    | -3.570911 | -1.227359 | -0.707966 |



|   |           |           |           |   |           |           |           |
|---|-----------|-----------|-----------|---|-----------|-----------|-----------|
| C | 3.525851  | 0.567819  | 2.864004  | H | -2.341778 | 2.336864  | 1.361646  |
| C | 2.411505  | -0.398001 | 2.363926  | H | -3.822149 | 2.028858  | 2.26649   |
| C | -3.525836 | 0.567737  | -2.863775 | H | -3.571166 | 1.227108  | 0.708118  |
| C | -2.411445 | -0.398035 | -2.363796 | H | -1.192942 | 0.091575  | 4.155478  |
| C | -1.645915 | -1.678174 | 1.636756  | H | -2.213806 | 1.539659  | 4.193926  |
| C | -2.411505 | 0.398001  | 2.363926  | H | -0.744089 | 1.525294  | 3.208357  |
| C | -0.808815 | -2.595671 | 0.840825  | H | -4.41492  | -0.537012 | 2.227999  |
| C | 0.808724  | -2.595653 | -0.840766 | H | -3.82061  | -0.349939 | 3.8922    |
| C | 1.645843  | -1.678144 | -1.636661 | C | -0.000134 | -4.697241 | -0.000075 |
| C | 2.411445  | 0.398035  | -2.363796 | H | -1.501535 | -4.512304 | 1.554091  |
| H | 4.41492   | 0.537012  | 2.227999  | H | 1.501247  | -4.512272 | -1.554257 |
| H | 3.82061   | 0.349939  | 3.8922    | H | 1.192938  | 0.091384  | -4.155359 |
| C | 3.069945  | -1.565048 | 1.619802  | H | 2.213534  | 1.539668  | -4.193793 |
| C | 1.583344  | -0.915706 | 3.551947  | H | 0.743825  | 1.525005  | -3.208214 |
| H | -4.414839 | 0.536958  | -2.227667 | H | 2.341529  | 2.337004  | -1.361716 |
| H | -3.820724 | 0.349833  | -3.891931 | H | 3.821999  | 2.028968  | -2.266388 |
| C | -1.583191 | -0.915586 | -3.551824 | H | 3.570911  | 1.227359  | -0.707966 |
| C | -3.069753 | -1.565187 | -1.619726 | H | 4.414839  | -0.536958 | -2.227667 |
| S | -2.833504 | -2.268951 | 2.779434  | H | 3.820724  | -0.349833 | -3.891931 |
| C | -3.069945 | 1.565048  | 1.619802  | I | -0.000227 | -6.805902 | -0.000179 |
| C | -1.583344 | 0.915706  | 3.551947  |   |           |           |           |

**Table S12** Cartesian coordinates for the optimized geometries of **3(ClO<sub>4</sub>)** in quintet state.

| Atom | x         | y        | z         | Atom | x         | y         | z         |
|------|-----------|----------|-----------|------|-----------|-----------|-----------|
| I    | 0.000181  | 7.009986 | -0.000476 | C    | -3.665295 | -0.948191 | 2.89426   |
| C    | 0         | 4.902714 | -0.000158 | C    | -0.885878 | -4.194933 | 0.821174  |
| C    | 0.885878  | 4.194933 | 0.821174  | C    | 0.885978  | -4.194834 | -0.821295 |
| C    | -0.885978 | 4.194834 | -0.821295 | S    | 2.924733  | -2.619621 | -2.699137 |
| C    | 0.848463  | 2.799092 | 0.795779  | C    | 1.75102   | 0.544482  | -3.659431 |
| H    | 1.588798  | 4.717639 | 1.459843  | C    | 3.239761  | 1.267209  | -1.755757 |
| C    | -0.848757 | 2.798992 | -0.795529 | C    | 3.665667  | -0.947719 | -2.893631 |
| H    | -1.588808 | 4.717478 | -1.460117 | H    | 2.499058  | -2.025707 | 1.490084  |
| N    | -0.000203 | 2.128573 | 0.000222  | H    | 3.965276  | -1.731795 | 2.431634  |
| C    | 1.737178  | 1.926335 | 1.606103  | H    | 3.769569  | -0.9575   | 0.849497  |
| C    | -1.737477 | 1.92613  | -1.605738 | H    | 1.33034   | 0.301515  | 4.210985  |
| Fe   | 0         | 0        | 0.000133  | H    | 2.387661  | -1.11655  | 4.342344  |
| S    | 2.923929  | 2.619947 | 2.700007  | H    | 0.930483  | -1.191616 | 3.336238  |
| N    | 1.65522   | 0.641112 | 1.508345  | H    | -1.330661 | 0.302047  | -4.210874 |
| S    | -2.924733 | 2.619621 | -2.699137 | H    | -2.387735 | -1.116186 | -4.342526 |
| N    | -1.655199 | 0.640901 | -1.508201 | H    | -0.930388 | -1.191276 | -3.336638 |

|   |           |           |           |   |           |           |           |
|---|-----------|-----------|-----------|---|-----------|-----------|-----------|
| N | -1.65522  | -0.641112 | 1.508345  | H | -2.49819  | -2.026066 | -1.490203 |
| N | 0.000203  | -2.128573 | 0.000222  | H | -3.964547 | -1.732641 | -2.431689 |
| N | 1.655199  | -0.640901 | -1.508201 | H | -3.769164 | -0.958542 | -0.84942  |
| C | 3.665295  | 0.948191  | 2.89426   | H | -2.499058 | 2.025707  | 1.490084  |
| C | 2.576152  | -0.07228  | 2.45012   | H | -3.965276 | 1.731795  | 2.431634  |
| C | -3.665667 | 0.947719  | -2.893631 | H | -3.769569 | 0.9575    | 0.849497  |
| C | -2.576136 | -0.072532 | -2.449923 | H | -1.33034  | -0.301515 | 4.210985  |
| C | -1.737178 | -1.926335 | 1.606103  | H | -2.387661 | 1.11655   | 4.342344  |
| C | -2.576152 | 0.07228   | 2.45012   | H | -0.930483 | 1.191616  | 3.336238  |
| C | -0.848463 | -2.799092 | 0.795779  | H | -4.558444 | -0.90217  | 2.265039  |
| C | 0.848757  | -2.798992 | -0.795529 | H | -3.959969 | -0.805687 | 3.935737  |
| C | 1.737477  | -1.92613  | -1.605738 | C | 0         | -4.902714 | -0.000158 |
| C | 2.576136  | 0.072532  | -2.449923 | H | -1.588798 | -4.717639 | 1.459843  |
| H | 4.558444  | 0.90217   | 2.265039  | H | 1.588808  | -4.717478 | -1.460117 |
| H | 3.959969  | 0.805687  | 3.935737  | H | 1.330661  | -0.302047 | -4.210874 |
| C | 3.240298  | -1.266567 | 1.755764  | H | 2.387735  | 1.116186  | -4.342526 |
| C | 1.750937  | -0.544754 | 3.65933   | H | 0.930388  | 1.191276  | -3.336638 |
| H | -4.558682 | 0.901273  | -2.264252 | H | 2.49819   | 2.026066  | -1.490203 |
| H | -3.960498 | 0.805342  | -3.935079 | H | 3.964547  | 1.732641  | -2.431689 |
| C | -1.75102  | -0.544482 | -3.659431 | H | 3.769164  | 0.958542  | -0.84942  |
| C | -3.239761 | -1.267209 | -1.755757 | H | 4.558682  | -0.901273 | -2.264252 |
| S | -2.923929 | -2.619947 | 2.700007  | H | 3.960498  | -0.805342 | -3.935079 |
| C | -3.240298 | 1.266567  | 1.755764  | I | -0.000181 | -7.009986 | -0.000476 |
| C | -1.750937 | 0.544754  | 3.65933   |   |           |           |           |

**Table S13** Cartesian coordinates for the optimized geometries of **4(ClO<sub>4</sub>)** in singlet state.

| Atom | x         | y         | z         | Atom | x         | y         | z         |
|------|-----------|-----------|-----------|------|-----------|-----------|-----------|
| Fe   | 0.001526  | 0.048966  | -0.000625 | H    | 2.386224  | -1.564291 | -2.126906 |
| N    | -0.449683 | -1.353841 | -1.38573  | H    | -0.414952 | -3.768096 | -3.759764 |
| N    | -1.874704 | 0.041432  | 0.143061  | H    | -0.581668 | -2.049838 | -4.254679 |
| N    | -0.247374 | 1.509542  | 1.389653  | H    | -4.592693 | -1.440803 | -1.269046 |
| N    | 0.269711  | 1.449488  | -1.436572 | H    | -4.678708 | 0.029223  | 0.361143  |
| N    | 1.880365  | 0.035793  | -0.120105 | H    | -4.384808 | 1.520836  | 1.917159  |
| N    | 0.42653   | -1.369973 | 1.378588  | H    | -0.27627  | 4.423089  | 2.048465  |
| C    | 0.33214   | -2.332226 | -2.249899 | H    | 0.122417  | 3.928047  | 3.726084  |
| C    | -1.75271  | -1.540348 | -1.525416 | H    | 0.477423  | 1.268387  | 4.068555  |
| C    | -2.62886  | -0.760439 | -0.659595 | H    | 1.968918  | 2.241677  | 3.933828  |
| C    | -2.502279 | 0.850163  | 1.050519  | H    | 1.813331  | 0.72701   | 3.005188  |
| C    | -1.513502 | 1.679489  | 1.732335  | H    | 2.561868  | 2.313246  | 1.094775  |
| C    | 0.666313  | 2.41552   | 2.202792  | H    | 2.274548  | 3.839248  | 1.949753  |

|   |           |           |           |   |           |           |           |
|---|-----------|-----------|-----------|---|-----------|-----------|-----------|
| C | -0.636528 | 2.269063  | -2.34069  | H | 1.389659  | 3.505329  | 0.4384    |
| C | 1.542439  | 1.649688  | -1.735024 | H | -0.21894  | 1.02996   | -4.110545 |
| C | 2.524818  | 0.852359  | -1.009023 | H | -1.73658  | 1.967741  | -4.194418 |
| C | 2.618206  | -0.792912 | 0.670276  | H | -1.656115 | 0.511389  | -3.171379 |
| C | 1.726166  | -1.588629 | 1.506962  | H | -2.587046 | 2.063457  | -1.351387 |
| C | -0.366736 | -2.221504 | 2.362463  | H | -2.360191 | 3.576497  | -2.249274 |
| C | 0.699454  | -3.559916 | -1.389711 | H | -1.551474 | 3.364294  | -0.673687 |
| C | 1.591635  | -1.713701 | -2.873479 | H | 0.204953  | 4.318672  | -2.168902 |
| C | -0.626557 | -2.748586 | -3.402101 | H | -0.08866  | 3.786616  | -3.857385 |
| S | -2.33787  | -2.689504 | -2.711721 | H | 4.421416  | 1.53713   | -1.831651 |
| C | -4.029513 | -0.791536 | -0.594582 | C | 4.686511  | 0.008588  | -0.305573 |
| C | -3.888755 | 0.866546  | 1.194555  | H | 4.568565  | -1.534216 | 1.253202  |
| S | -1.936069 | 2.893145  | 2.921666  | H | 0.435506  | -4.265542 | 2.018319  |
| C | -0.228929 | 3.569528  | 2.746154  | H | 0.354887  | -3.788751 | 3.747586  |
| C | 1.26175   | 1.60683   | 3.372176  | H | -2.441057 | -1.994815 | 1.675547  |
| C | 1.784522  | 3.045482  | 1.359008  | H | -2.072697 | -3.546694 | 2.447933  |
| C | -1.083898 | 1.383451  | -3.522763 | H | -1.504653 | -3.244398 | 0.785258  |
| C | -1.851635 | 2.844141  | -1.59823  | H | 0.262992  | -1.086354 | 4.138061  |
| C | 0.228421  | 3.455639  | -2.856386 | H | -1.271783 | -1.981359 | 4.323556  |
| S | 1.969276  | 2.846362  | -2.93969  | H | -1.236092 | -0.476476 | 3.369395  |
| C | 3.912734  | 0.872804  | -1.127212 | O | -6.003306 | 0.102089  | 0.55276   |
| C | 4.019374  | -0.844111 | 0.608461  | O | 6.014082  | 0.080061  | -0.475999 |
| S | 2.289666  | -2.824562 | 2.6143    | C | -6.880055 | -0.710908 | -0.265217 |
| C | 0.548377  | -3.426711 | 2.725984  | C | 6.874715  | -0.765282 | 0.326211  |
| C | -1.670574 | -2.77501  | 1.768195  | H | -6.672053 | -1.784143 | -0.110798 |
| C | -0.664716 | -1.383222 | 3.621886  | H | -6.777639 | -0.442325 | -1.331174 |
| H | 1.324468  | -3.268455 | -0.531605 | H | -7.893727 | -0.474012 | 0.082816  |
| H | 1.274968  | -4.277751 | -1.999706 | H | 7.894885  | -0.517252 | 0.006033  |
| H | -0.201958 | -4.076485 | -1.016982 | H | 6.668357  | -1.831413 | 0.127017  |
| H | 1.370707  | -0.7536   | -3.367694 | H | 6.752895  | -0.537482 | 1.399604  |
| H | 1.990489  | -2.403375 | -3.637873 |   |           |           |           |

**Table S14** Cartesian coordinates for the optimized geometries of **4(ClO<sub>4</sub>)** in quintet state.

| Atom | x         | y         | z         | Atom | x         | y         | z         |
|------|-----------|-----------|-----------|------|-----------|-----------|-----------|
| Fe   | -0.002631 | 0.062111  | -0.005349 | H    | 1.995447  | -0.653157 | -2.814238 |
| N    | -0.695336 | -0.795366 | -1.968409 | H    | -0.949456 | -2.254926 | -5.002899 |
| N    | -2.05073  | -0.010653 | 0.156522  | H    | -1.052151 | -0.465248 | -4.906854 |
| N    | -0.450498 | 1.013389  | 1.992929  | H    | -4.783133 | -0.8565   | -1.686587 |
| N    | 0.527187  | 2.022184  | -0.930303 | H    | -4.857592 | -0.089704 | 0.367825  |
| N    | 2.055882  | 0.040669  | -0.094526 | H    | -4.552827 | 0.75196   | 2.347021  |

|    |           |           |           |   |           |           |           |
|----|-----------|-----------|-----------|---|-----------|-----------|-----------|
| N  | 0.611289  | -1.958577 | 0.86392   | H | -0.669131 | 3.46269   | 3.736274  |
| C  | -0.026584 | -1.407017 | -3.169064 | H | -0.315895 | 2.341266  | 5.090494  |
| C  | -2.000083 | -0.883439 | -2.03455  | H | 0.248534  | -0.196423 | 4.380619  |
| C  | -2.812674 | -0.458884 | -0.875183 | H | 1.681611  | 0.831469  | 4.67641   |
| C  | -2.674702 | 0.428651  | 1.287592  | H | 1.613625  | -0.204648 | 3.22192   |
| C  | -1.727748 | 0.983607  | 2.277947  | H | 2.201081  | 1.981842  | 1.973359  |
| C  | 0.370535  | 1.59374   | 3.111167  | H | 1.977396  | 3.031118  | 3.394453  |
| C  | -0.251438 | 3.185226  | -1.47839  | H | 1.010064  | 3.321293  | 1.920402  |
| C  | 1.819219  | 2.185227  | -1.060576 | H | 0.131755  | 2.670649  | -3.581098 |
| C  | 2.72727   | 1.1014    | -0.630426 | H | -1.356625 | 3.62205   | -3.308532 |
| C  | 2.771757  | -1.022499 | 0.353405  | H | -1.320755 | 1.887091  | -2.879443 |
| C  | 1.910899  | -2.110773 | 0.867569  | H | -2.189038 | 2.696524  | -0.584617 |
| C  | -0.097523 | -3.133343 | 1.482023  | H | -1.954327 | 4.42653   | -0.937113 |
| C  | 0.370038  | -2.854166 | -2.804794 | H | -1.129749 | 3.688674  | 0.466748  |
| C  | 1.210122  | -0.596919 | -3.586193 | H | 0.705253  | 4.990649  | -0.593011 |
| C  | -1.076439 | -1.399717 | -4.320865 | H | 0.510596  | 5.072162  | -2.374576 |
| S  | -2.732085 | -1.515183 | -3.507405 | H | 4.647075  | 1.995665  | -1.148774 |
| C  | -4.212342 | -0.507405 | -0.822562 | C | 4.8678    | 0.028441  | -0.253325 |
| C  | -4.059538 | 0.396405  | 1.437597  | H | 4.702805  | -1.958523 | 0.661114  |
| S  | -2.276345 | 1.652938  | 3.810911  | H | 0.782555  | -4.923686 | 0.491838  |
| C  | -0.602569 | 2.401033  | 4.028981  | H | 0.763215  | -5.019378 | 2.28409   |
| C  | 1.013943  | 0.430886  | 3.893993  | H | -2.12654  | -2.671816 | 0.806368  |
| C  | 1.45091   | 2.537696  | 2.559163  | H | -1.827186 | -4.39816  | 1.121531  |
| C  | -0.725148 | 2.814159  | -2.89999  | H | -1.172372 | -3.644351 | -0.360243 |
| C  | -1.449698 | 3.514534  | -0.574152 | H | 0.487917  | -2.609031 | 3.536464  |
| C  | 0.723108  | 4.402671  | -1.526524 | H | -0.998255 | -3.596788 | 3.411874  |
| S  | 2.42221   | 3.702182  | -1.718189 | H | -1.04531  | -1.861548 | 2.990213  |
| C  | 4.116477  | 1.137673  | -0.725485 | O | -6.17845  | -0.092622 | 0.580249  |
| C  | 4.171278  | -1.076446 | 0.295851  | O | 6.195918  | 0.129407  | -0.375501 |
| S  | 2.588999  | -3.627799 | 1.455149  | C | -7.064372 | -0.562097 | -0.467466 |
| C  | 0.886584  | -4.342864 | 1.424077  | C | 7.035979  | -0.960249 | 0.08347   |
| C  | -1.380263 | -3.477054 | 0.709009  | H | -6.852404 | -1.617702 | -0.710471 |
| C  | -0.428843 | -2.774097 | 2.945609  | H | -6.973634 | 0.073212  | -1.365506 |
| H  | 1.020255  | -2.863442 | -1.914842 | H | -8.073825 | -0.471009 | -0.046404 |
| Fe | 0.923587  | -3.313776 | -3.641909 | H | 8.06284   | -0.631186 | -0.121057 |
| N  | -0.520284 | -3.474061 | -2.600649 | H | 6.817499  | -1.882599 | -0.481964 |
| N  | 0.956666  | 0.461537  | -3.758927 |   |           |           |           |

**Table S15** Cartesian coordinates for the optimized geometries of **5(CIO<sub>4</sub>)** in singlet state.

| Atom | x | y | z | Atom | x | y | z |
|------|---|---|---|------|---|---|---|
|------|---|---|---|------|---|---|---|

|    |           |           |           |   |           |           |           |
|----|-----------|-----------|-----------|---|-----------|-----------|-----------|
| Fe | -0.001489 | -0.017604 | -0.041721 | H | -1.087214 | 4.54777   | 1.608378  |
| N  | 1.916464  | -0.140104 | -0.032802 | H | -1.965827 | 2.852329  | 3.334122  |
| N  | 0.495169  | 1.525452  | 1.310488  | H | -1.38896  | 1.187347  | 3.259171  |
| N  | -1.918636 | 0.120083  | -0.070569 | H | -2.294968 | 1.889182  | 1.903761  |
| N  | -0.524433 | -1.328611 | 1.523598  | H | 0.555777  | 2.490837  | 4.118836  |
| N  | 0.303225  | -1.657339 | -1.346612 | H | 0.57216   | 4.126662  | 3.434331  |
| N  | -0.278251 | 1.369877  | -1.612911 | H | -4.608927 | -1.1025   | 1.526522  |
| C  | 2.538808  | -1.050664 | -0.806953 | C | -4.701753 | 0.326072  | -0.109913 |
| C  | 2.643737  | 0.68053   | 0.740929  | H | -4.362454 | 1.725797  | -1.733317 |
| C  | 1.775306  | 1.599876  | 1.493685  | H | 1.31997   | -0.426082 | 3.298298  |
| C  | -0.242005 | 2.604984  | 2.062915  | H | 1.233575  | -1.778006 | 4.426466  |
| C  | -2.661455 | -0.579331 | 0.801419  | H | -0.17925  | -0.74732  | 4.18486   |
| C  | -2.523865 | 0.927078  | -0.963931 | H | 1.117411  | -3.455904 | 1.058843  |
| C  | 0.211891  | -2.148311 | 2.551154  | H | 1.821259  | -3.580766 | 2.671353  |
| C  | -1.808128 | -1.395558 | 1.679723  | H | 2.204434  | -2.192827 | 1.665785  |
| C  | 1.564807  | -1.894295 | -1.518578 | H | -0.623753 | -3.423223 | 4.144948  |
| C  | -0.563364 | -2.581977 | -2.164751 | H | -0.779733 | -4.121762 | 2.523558  |
| C  | 0.597394  | 2.106072  | -2.598701 | H | -2.267517 | -3.88021  | -1.925136 |
| C  | -1.534731 | 1.621931  | -1.804308 | H | -2.489899 | -2.306928 | -1.179051 |
| C  | 3.917429  | -1.158872 | -0.842956 | H | -1.449899 | -3.518978 | -0.404822 |
| C  | 4.032188  | 0.630396  | 0.774298  | H | 0.074693  | -4.167018 | -3.559718 |
| S  | 2.413784  | 2.779037  | 2.619472  | H | 0.240792  | -4.616986 | -1.854266 |
| C  | -0.52056  | 3.766913  | 1.096263  | H | -1.723793 | -2.466756 | -3.988094 |
| C  | -1.548309 | 2.091517  | 2.670498  | H | -0.207222 | -1.566426 | -4.066796 |
| C  | 0.696877  | 3.06959   | 3.2056    | H | -1.576394 | -0.922786 | -3.148678 |
| C  | -4.049    | -0.511863 | 0.81401   | H | 0.07467   | 0.835074  | -4.299495 |
| C  | -3.900328 | 1.061019  | -1.012248 | H | 1.465081  | 0.260876  | -3.367009 |
| C  | 0.67042   | -1.212625 | 3.680618  | H | 1.635623  | 1.64812   | -4.441667 |
| C  | 1.407166  | -2.882212 | 1.940589  | H | -0.003488 | 3.524292  | -4.174903 |
| C  | -0.797076 | -3.193173 | 3.09506   | H | -0.114115 | 4.196493  | -2.538016 |
| S  | -2.468408 | -2.45333  | 2.908446  | H | 2.562633  | 1.854501  | -1.688442 |
| S  | 2.061089  | -3.214857 | -2.55365  | H | 1.642494  | 3.230595  | -1.047491 |
| C  | -1.760047 | -3.09436  | -1.360735 | H | 2.381264  | 3.313586  | -2.646133 |
| C  | 0.319455  | -3.794928 | -2.566277 | S | 6.437608  | -0.495963 | -0.142197 |
| C  | -1.041169 | -1.833562 | -3.416888 | S | -6.432456 | 0.539778  | -0.238772 |
| C  | 0.959153  | 1.149316  | -3.743982 | C | 7.100102  | 0.745214  | 1.015063  |
| C  | -0.240488 | 3.294483  | -3.137445 | C | -7.118629 | -0.538043 | 1.059753  |
| C  | 1.867326  | 2.652716  | -1.944174 | H | 8.181904  | 0.629947  | 0.955944  |
| S  | -2.002726 | 2.78984   | -3.020753 | H | 6.786283  | 0.546636  | 2.039265  |
| H  | 4.393717  | -1.903836 | -1.470313 | H | 6.842649  | 1.758208  | 0.707616  |
| C  | 4.702976  | -0.300048 | -0.041459 | H | -6.799855 | -0.223021 | 2.052778  |
| H  | 4.578648  | 1.303688  | 1.420965  | H | -6.882065 | -1.585843 | 0.877946  |

|   |           |          |          |   |           |           |          |
|---|-----------|----------|----------|---|-----------|-----------|----------|
| H | -1.109842 | 3.433441 | 0.242845 | H | -8.197937 | -0.408983 | 0.985469 |
| H | 0.404972  | 4.21361  | 0.727294 |   |           |           |          |

**Table S16** Cartesian coordinates for the optimized geometries of **5(CIO<sub>4</sub>)** in quintet state.

| Atom | x         | y        | z        | Atom | x         | y        | z        |
|------|-----------|----------|----------|------|-----------|----------|----------|
| Fe   | 0.000939  | 0.01951  | -0.04262 | H    | 0.761492  | -4.62996 | 1.94173  |
| N    | -2.094691 | 0.146342 | -0.03339 | H    | 1.666603  | -2.8729  | 3.565147 |
| N    | -0.717784 | -1.59625 | 1.445963 | H    | 1.062537  | -1.21543 | 3.474968 |
| N    | 2.095466  | -0.14247 | -0.0742  | H    | 1.975434  | -1.90886 | 2.123518 |
| N    | 0.76012   | 1.487503 | 1.548807 | H    | -0.933124 | -2.42916 | 4.301262 |
| N    | -0.519378 | 1.774235 | -1.45207 | H    | -1.004052 | -4.08583 | 3.672896 |
| N    | 0.482546  | -1.57248 | -1.64384 | H    | 4.79898   | 1.185167 | 1.417127 |
| C    | -2.721402 | 1.050263 | -0.81012 | C    | 4.884643  | -0.35072 | -0.11507 |
| C    | -2.822914 | -0.66937 | 0.742876 | H    | 4.535868  | -1.85714 | -1.63339 |
| C    | -1.99898  | -1.59113 | 1.567401 | H    | -1.010007 | 0.688239 | 3.389304 |
| C    | -0.061384 | -2.65129 | 2.282095 | H    | -0.875416 | 2.067891 | 4.484444 |
| C    | 2.845972  | 0.608594 | 0.745212 | H    | 0.513823  | 1.004786 | 4.236797 |
| C    | 2.700709  | -1.00305 | -0.91416 | H    | -0.796251 | 3.675805 | 1.08636  |
| C    | 0.111415  | 2.364817 | 2.573516 | H    | -1.499734 | 3.804123 | 2.70146  |
| C    | 2.045148  | 1.499302 | 1.621635 | H    | -1.877301 | 2.410164 | 1.693292 |
| C    | -1.792493 | 1.925795 | -1.56943 | H    | 1.080579  | 3.632816 | 4.100894 |
| C    | 0.261665  | 2.705066 | -2.32785 | H    | 1.164528  | 4.305914 | 2.463381 |
| C    | -0.314618 | -2.36239 | -2.63898 | H    | 1.974029  | 4.018702 | -2.18237 |
| C    | 1.750481  | -1.7748  | -1.75262 | H    | 2.182516  | 2.493151 | -1.32763 |
| C    | -4.100405 | 1.153455 | -0.85049 | H    | 1.151945  | 3.76146  | -0.64038 |
| C    | -4.211833 | -0.63509 | 0.762175 | H    | -0.513984 | 4.194267 | -3.76418 |
| S    | -2.739894 | -2.68024 | 2.732471 | H    | -0.62255  | 4.717318 | -2.07483 |
| C    | 0.225355  | -3.86209 | 1.379628 | H    | 1.368294  | 2.553184 | -4.18654 |
| C    | 1.236401  | -2.12367 | 2.896771 | H    | -0.108962 | 1.583711 | -4.16703 |
| C    | -1.064616 | -3.03277 | 3.402759 | H    | 1.315183  | 1.048284 | -3.26309 |
| C    | 4.23424   | 0.546559 | 0.75156  | H    | 0.245204  | -1.09646 | -4.33258 |
| C    | 4.076742  | -1.1438  | -0.95848 | H    | -1.205095 | -0.56163 | -3.47046 |
| C    | -0.339361 | 1.473274 | 3.74141  | H    | -1.280301 | -1.96503 | -4.53939 |
| C    | -1.084301 | 3.10596  | 1.971348 | H    | 0.41465   | -3.79311 | -4.15391 |
| C    | 1.182649  | 3.38425  | 3.045717 | H    | 0.446571  | -4.43357 | -2.50107 |
| S    | 2.813751  | 2.581576 | 2.77353  | H    | -2.274035 | -2.0962  | -1.7338  |
| S    | -2.400595 | 3.194675 | -2.6216  | H    | -1.382542 | -3.49839 | -1.11483 |
| C    | 1.461247  | 3.275655 | -1.56741 | H    | -2.120759 | -3.54731 | -2.71815 |
| C    | -0.692258 | 3.859046 | -2.74368 | S    | -6.618392 | 0.466365 | -0.17342 |
| C    | 0.733424  | 1.921546 | -3.56117 | S    | 6.612268  | -0.57133 | -0.23842 |

|   |           |          |          |   |           |          |          |
|---|-----------|----------|----------|---|-----------|----------|----------|
| C | -0.654316 | -1.43689 | -3.81666 | C | -7.281456 | -0.7793  | 0.979191 |
| C | 0.582047  | -3.53828 | -3.10862 | C | 7.30615   | 0.591557 | 0.980436 |
| C | -1.596352 | -2.90687 | -2.00536 | H | -8.363526 | -0.67305 | 0.909385 |
| S | 2.319429  | -2.97741 | -2.8996  | H | -6.97866  | -0.57638 | 2.005761 |
| H | -4.579435 | 1.897618 | -1.47642 | H | -7.012134 | -1.79011 | 0.67509  |
| C | -4.886228 | 0.287295 | -0.05885 | H | 6.992804  | 0.344051 | 1.994024 |
| H | -4.759065 | -1.30954 | 1.406623 | H | 7.068213  | 1.624588 | 0.729425 |
| H | 0.844905  | -3.5717  | 0.530401 | H | 8.384966  | 0.457238 | 0.908595 |
| H | -0.697859 | -4.30603 | 1.00123  |   |           |          |          |

## SI4.2 The optimized geometric structures and the summary of their structural parameters

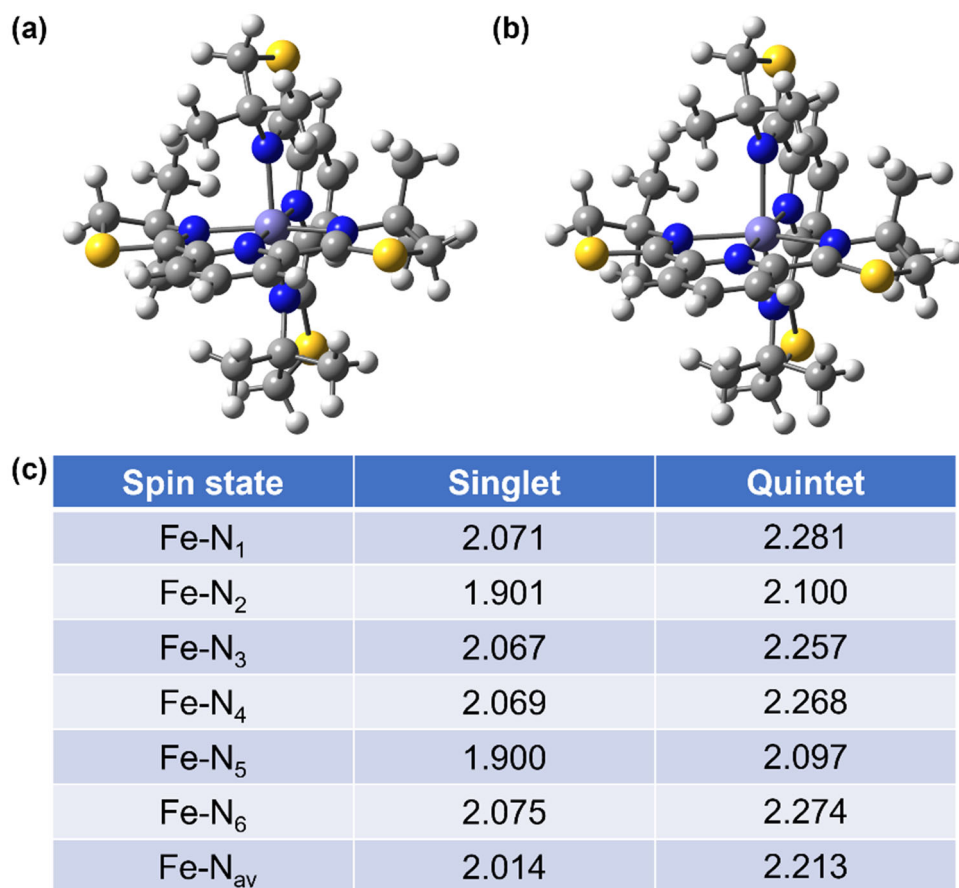

**Fig. S46** The geometrically optimized (a) singlet and (b) quintet state structures, and (c) the summary of Fe–N bond lengths in the calculated structures of complex **0**.<sup>2</sup>



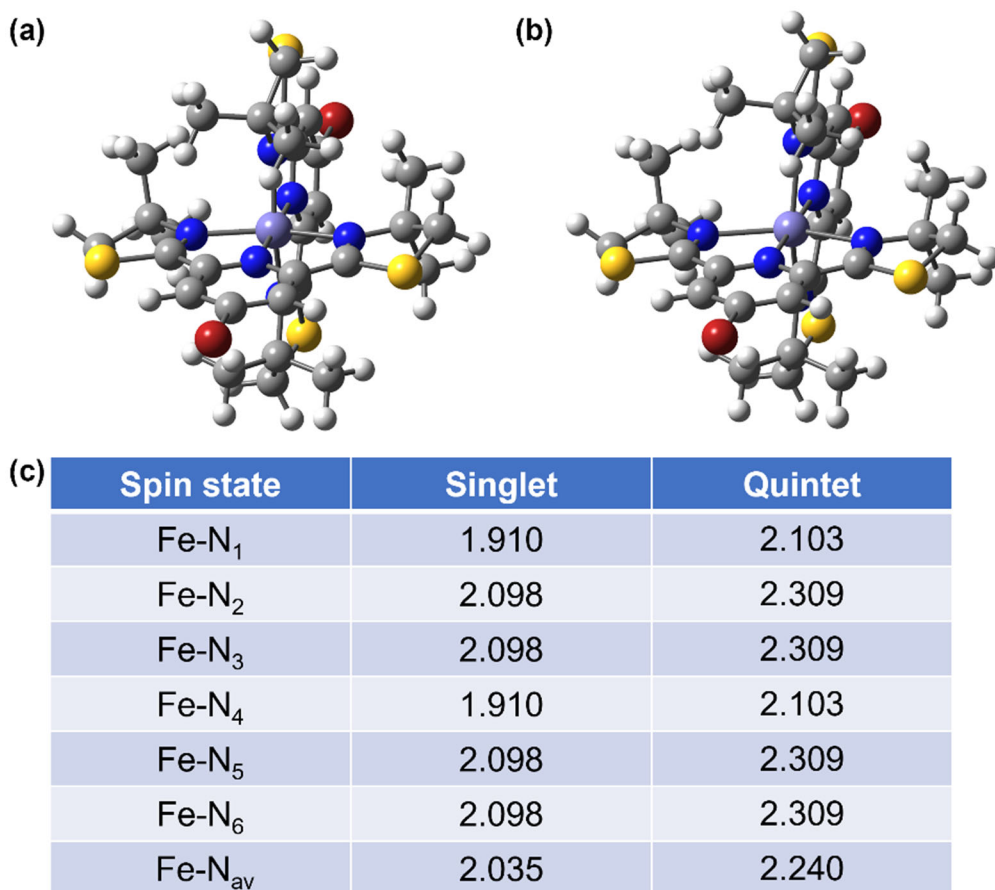

**Fig. S47** The geometrically optimized (a) singlet and (b) quintet state structures, and (c) the summary of Fe–N bond lengths in the calculated structures of complex **2**.

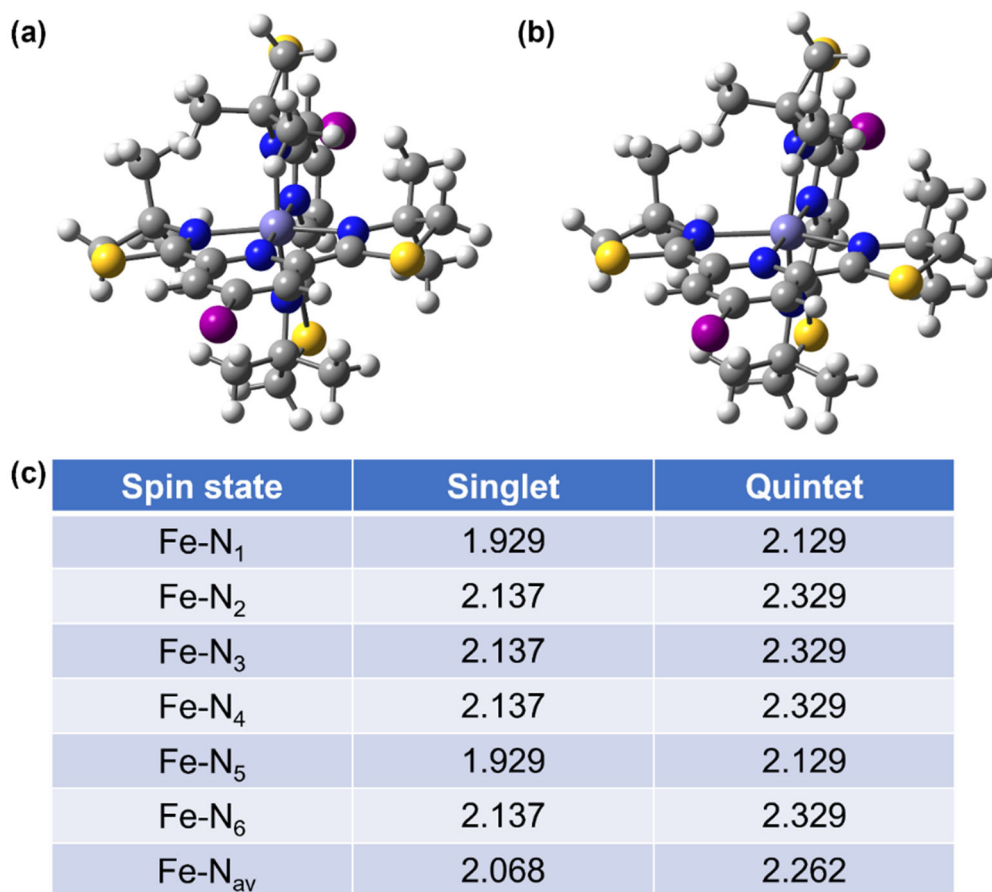

**Fig. S48** The geometrically optimized (a) singlet and (b) quintet state structures, and (c) the summary of Fe–N bond lengths in the calculated structures of complex **3**.

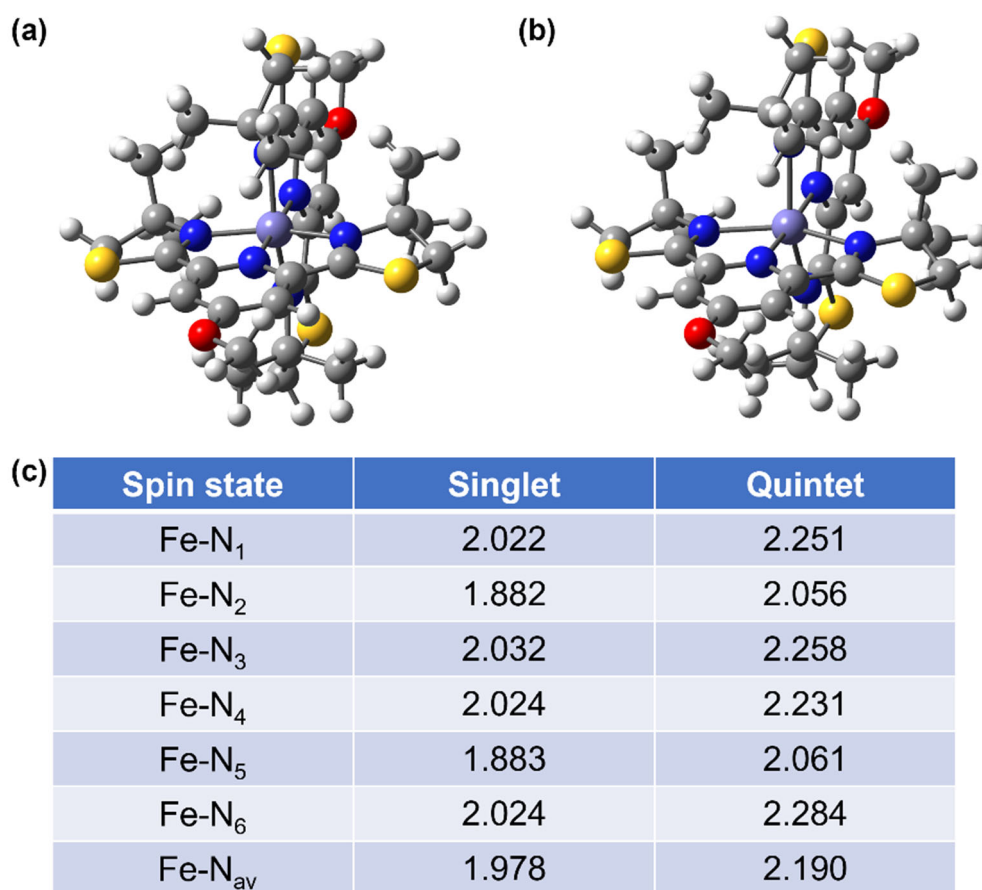

**Fig. S49** The geometrically optimized (a) singlet and (b) quintet state structures, and (c) the summary of Fe–N bond lengths in the calculated structures of complex **4**.

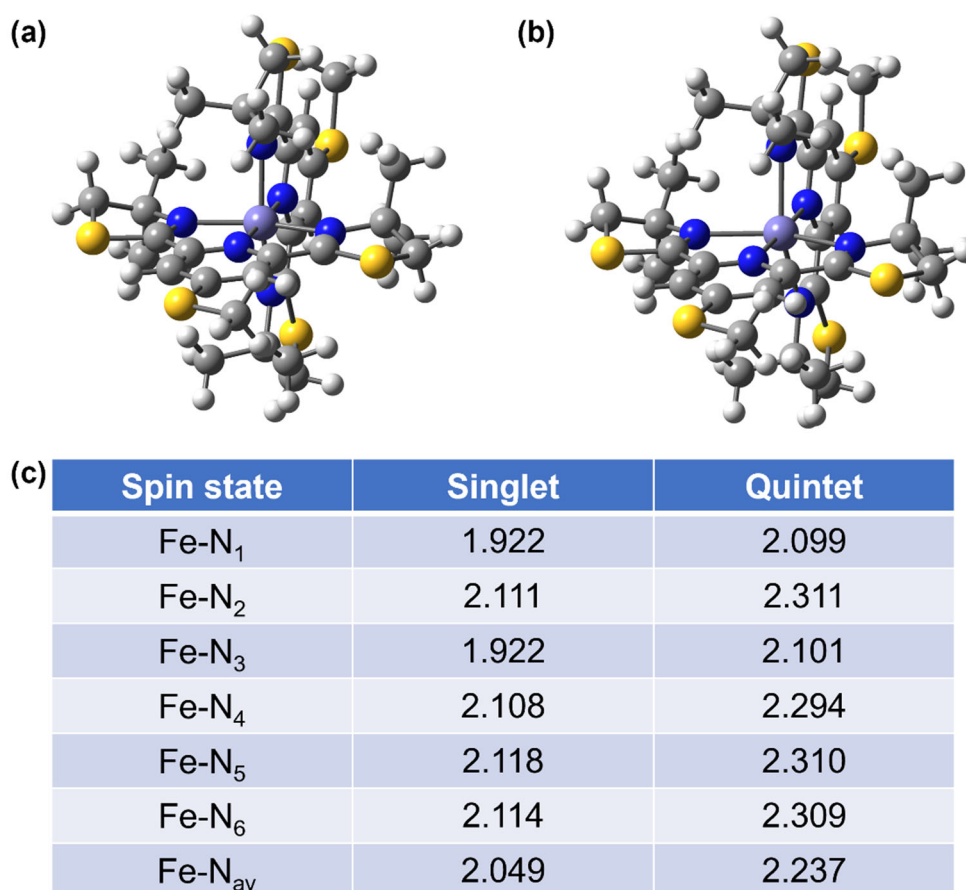

**Fig. S50** The geometrically optimized (a) singlet and (b) quintet state structures, and (c) the summary of Fe–N bond lengths in the calculated structures of complex **5**.

**Table S17** Summary of some key structural parameters of the optimized structures **0–5** at different spin states.

| complex  | spin state | $\Sigma$ (°) | $\theta$ (°) | $\phi$ (°) | Fe–N <sub>av</sub> (Å) | $S(O_h)$ | $S(T_h)$ |
|----------|------------|--------------|--------------|------------|------------------------|----------|----------|
| <b>0</b> | singlet    | 89.262       | 89.020       | 179.173    | 2.014                  | 2.346    | 9.428    |
|          | quintet    | 138.171      | 89.931       | 178.367    | 2.213                  | 4.922    | 6.647    |
| <b>1</b> | singlet    | 69.713       | 87.953       | 180.000    | 2.015                  | 2.402    | 9.389    |
|          | quintet    | 138.846      | 88.053       | 179.995    | 2.216                  | 4.988    | 6.653    |
| <b>2</b> | singlet    | 81.371       | 87.995       | 180.000    | 2.035                  | 2.501    | 9.274    |
|          | quintet    | 143.436      | 84.890       | 179.995    | 2.240                  | 5.275    | 6.710    |
| <b>3</b> | singlet    | 94.484       | 87.900       | 180.000    | 2.068                  | 2.668    | 9.090    |
|          | quintet    | 147.508      | 84.681       | 179.995    | 2.262                  | 5.534    | 6.561    |
| <b>4</b> | singlet    | 86.079       | 89.185       | 179.026    | 1.978                  | 2.159    | 9.661    |
|          | quintet    | 132.035      | 89.831       | 176.679    | 2.190                  | 4.653    | 6.924    |
| <b>5</b> | singlet    | 88.181       | 88.998       | 179.251    | 2.049                  | 2.702    | 8.938    |
|          | quintet    | 138.178      | 86.753       | 178.862    | 2.237                  | 5.295    | 6.511    |

**Table S18** The optimized single point energies of six [Fe(S-pybox)<sub>2</sub>]<sup>2+</sup> complexes in the high-spin (HS) and low-spin (LS) states and their energy gaps.

| Complex | R   | <i>E</i> (HS) (Ha) | <i>E</i> (LS)/Ha | $\Delta E$ (LS–HS) (Ha) | $\Delta E$ (LS–HS) (kcal mol <sup>-1</sup> ) |
|---------|-----|--------------------|------------------|-------------------------|----------------------------------------------|
| Fe0     | H   | -4350.3447129      | -4350.3278349    | 0.0168780               | 10.58                                        |
| Fe1     | Cl  | -5269.442739       | -5269.4279737    | 0.0147653               | 9.27                                         |
| Fe2     | Br  | -9497.3602109      | -9497.3441776    | 0.0160333               | 10.06                                        |
| Fe3     | I   | -3231.7297876      | -3231.7133885    | 0.0163991               | 10.29                                        |
| Fe4     | OMe | -4579.3393205      | -4579.3205513    | 0.0187692               | 11.78                                        |
| Fe5     | SMe | -5225.2729526      | -5225.2539154    | 0.0190372               | 11.94                                        |

## SI5 References

1. Hansch, C.; Leo, A.; Taft, R. W. A survey of Hammett substituent constants and resonance and field parameters. *Chem. Rev.* **1991**, 91 (2), 165-195 DOI: 10.1021/cr00002a004.
2. Pan, Y.; Meng, Y. S.; Liu, Q.; Gao, W. Q.; Liu, C. H.; Liu, T.; Zhu, Y. Y. Construction of SCO-Active Fe(II) Mononuclear Complexes from the Thio-pybox Ligand. *Inorg. Chem.* **2020**, 59 (11), 7398-7407 DOI: 10.1021/acs.inorgchem.9b03506.
